# Supplementary material for: Unlocking the Diversity of Pyrroloiminoquinones Produced by Latrunculid Sponge Species
Source: MDPI journal article supplement (doi:10.3390/md19020068), 2021-01-28
Supplement: s1 [file s1]

**S3: Additional MS<sup>2</sup> spectra associated with the combined molecular network in Fig. 2.**

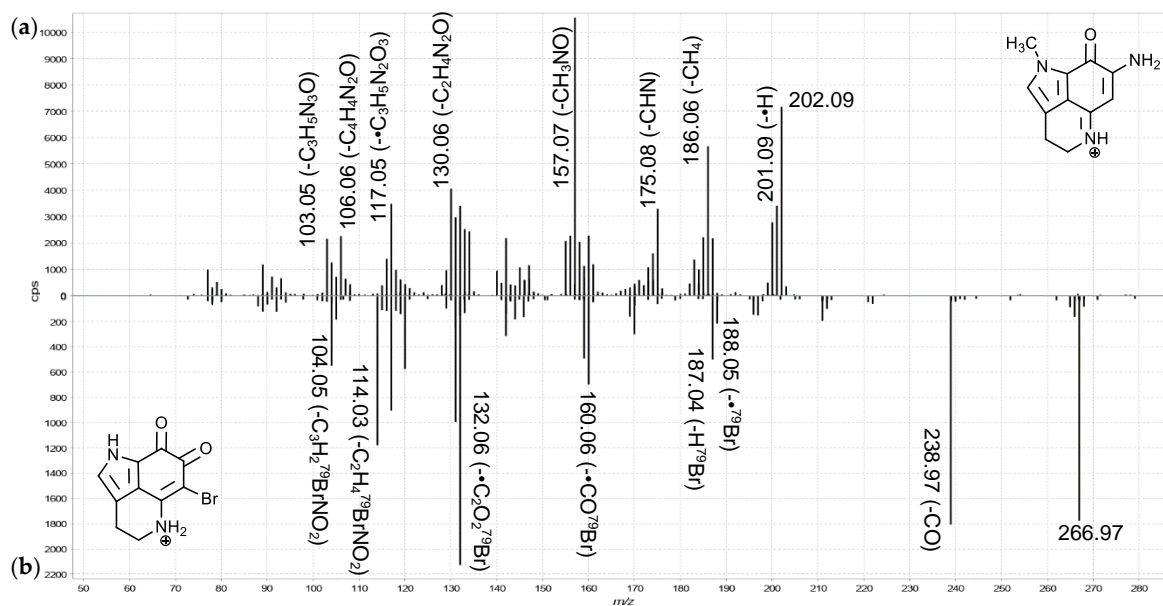

**S3.1:** MS<sup>2</sup> spectra of the 202.1 Da node **(a)**, annotated as makaluvamine A) and the 267.0 Da node **(b)**, annotated as makaluvamine O) from group A.

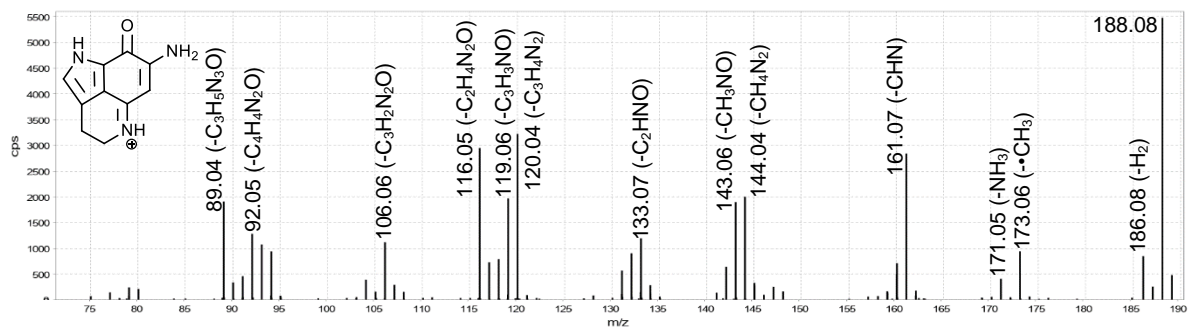

**S3.2:** MS<sup>2</sup> spectrum of the 188.0 Da node from group A (makaluvamine I).

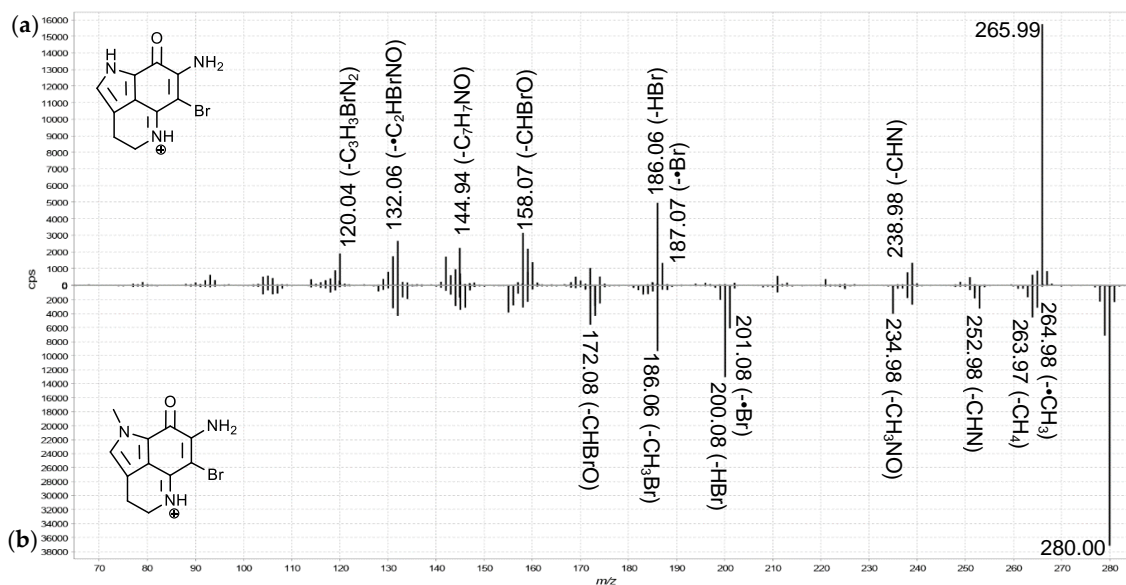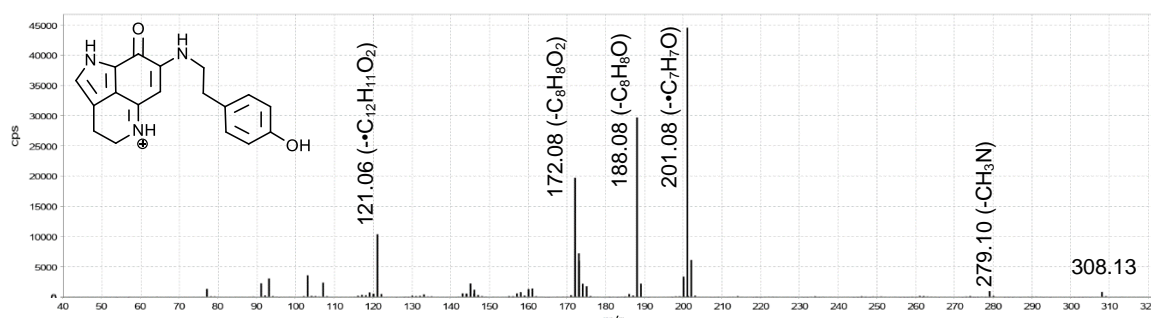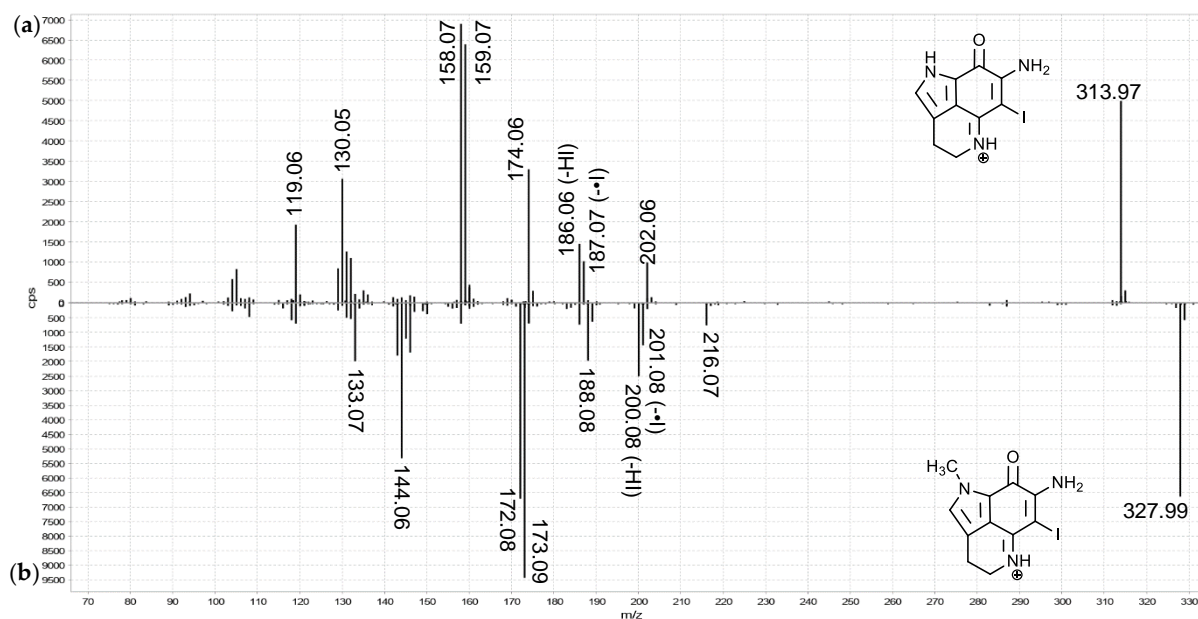

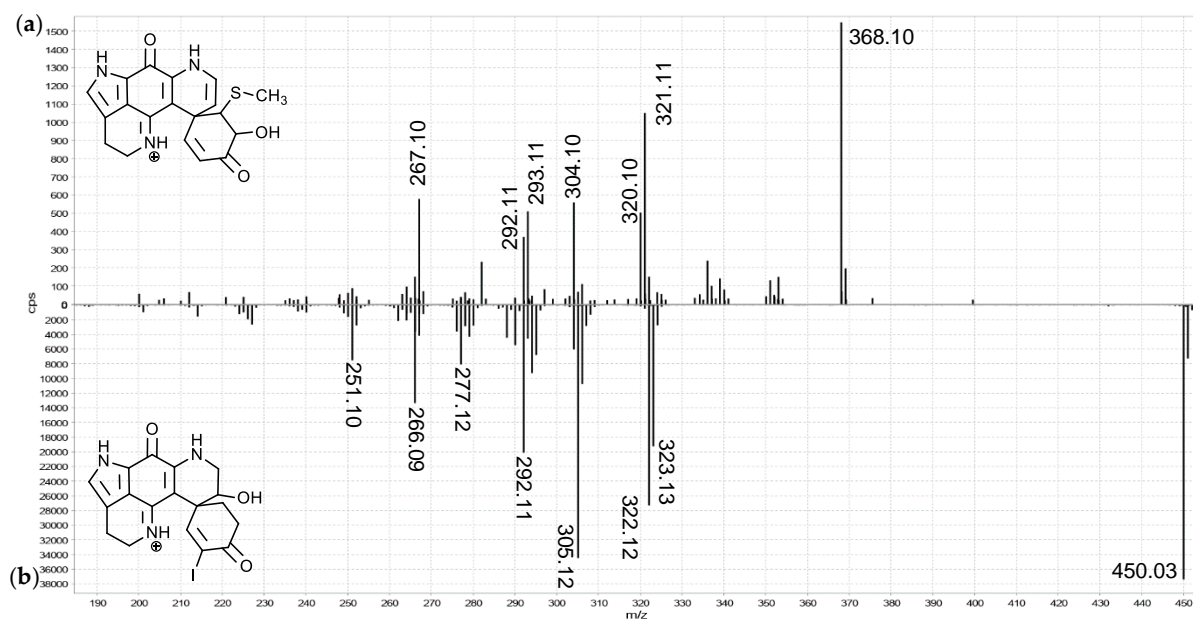

**S3.6:** MS<sup>2</sup> spectra of the 368.1 Da node (**a**, putative thiomethylated discorhabdin) and the 450.0 Da node (**b**, putative iodinated discorhabdin) from group C.

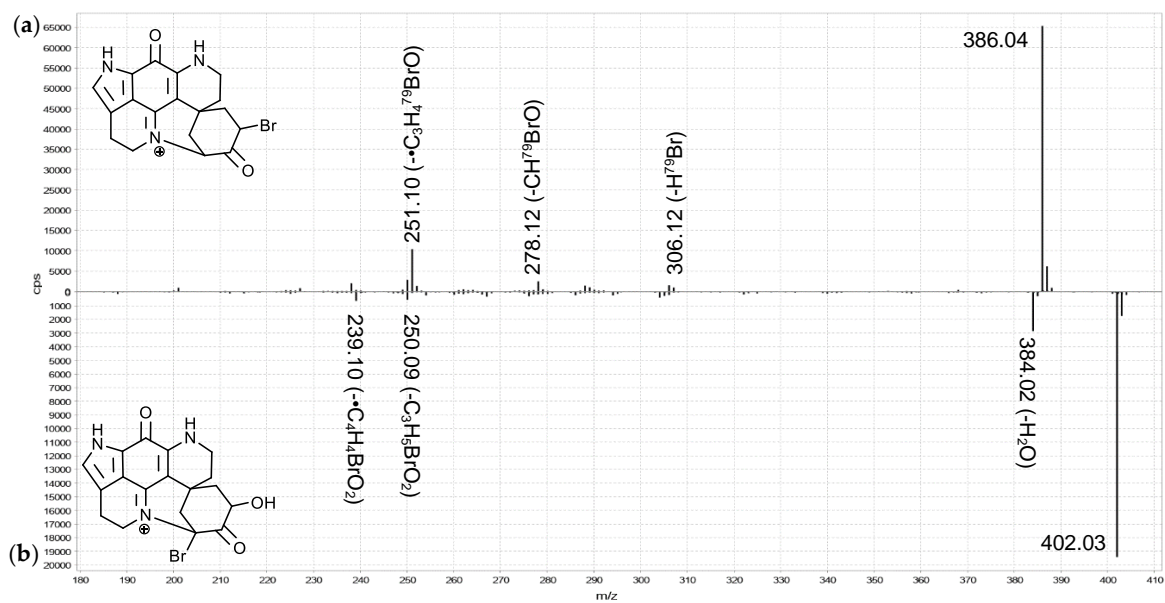

**S3.7:** MS<sup>2</sup> spectra of the purple 386.1 Da (**a**) and the rightmost 402.0 Da (**b**) node from group C (putative V-series discorhabdins).

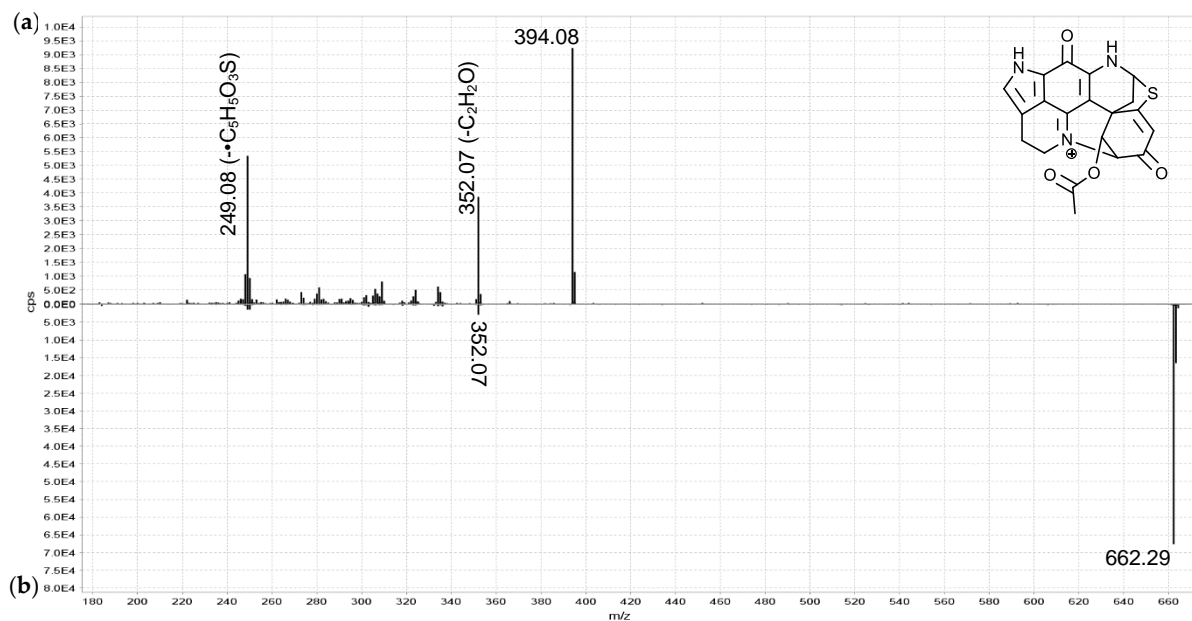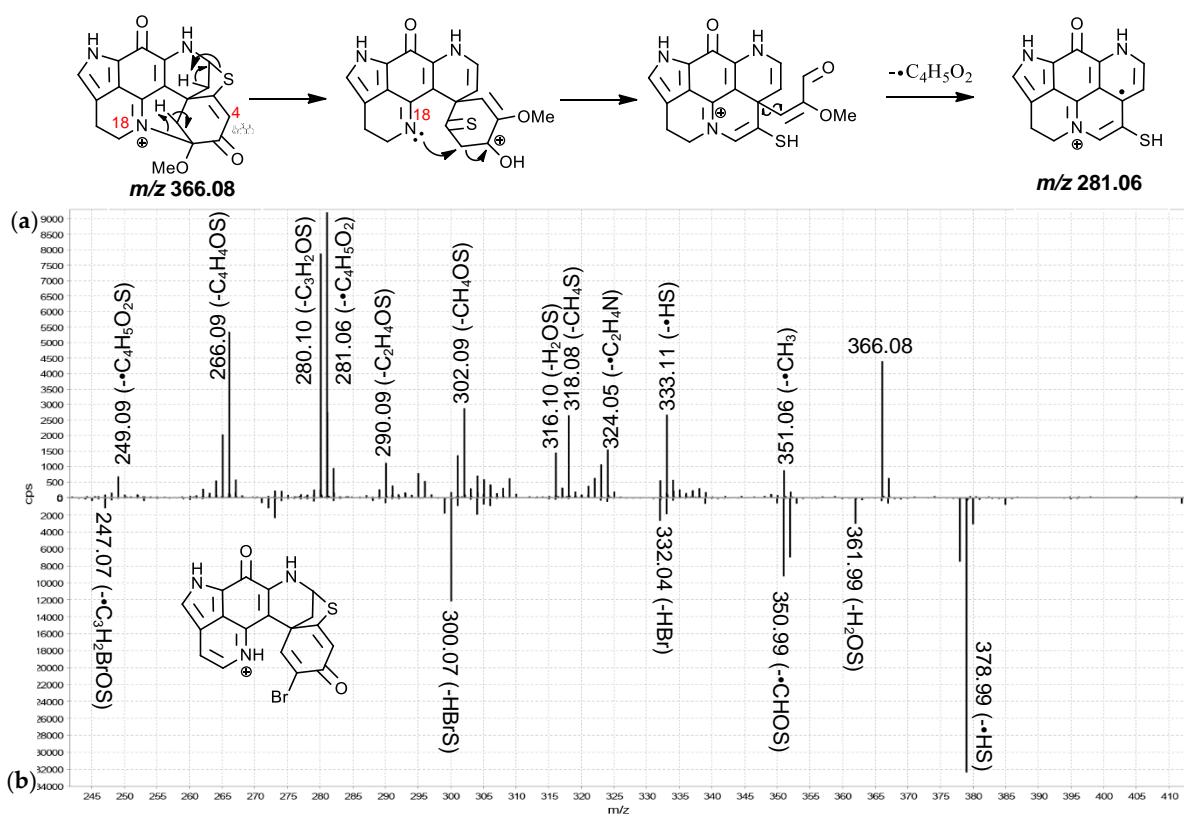

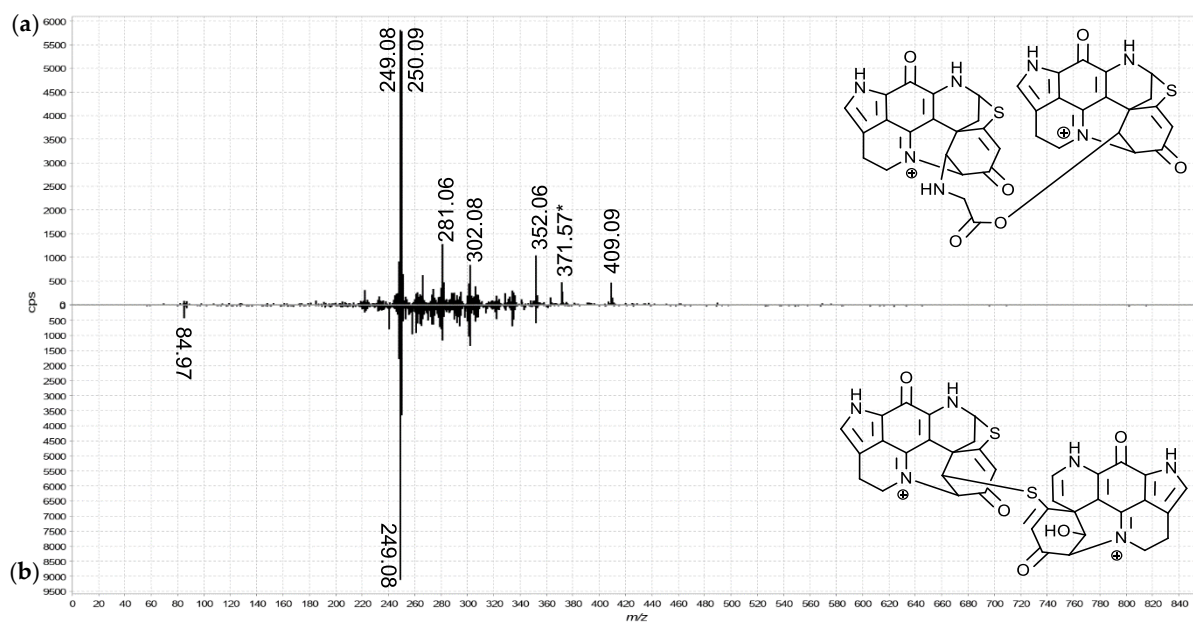

**S3.10:** Extended MS<sup>2</sup> spectra of the 742.2 Da (**a**, annotated as a glycine-linked discorhabdin dimer) and the 685.2 Da node (**b**, annotated as a discorhabdin dimer) from group F (Fig.7) (\*= doubly-charged residual precursor ion).

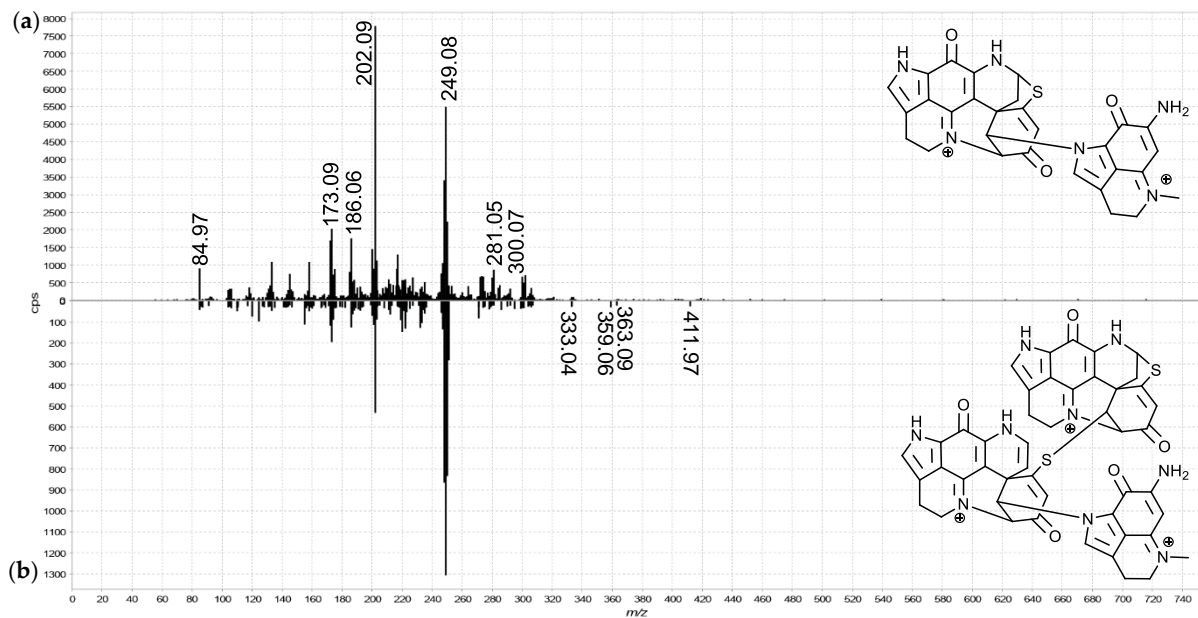

**S3.11:** Extended MS<sup>2</sup> spectra of the larger 535.2 Da (**a**, annotated as a discorhabdin-makaluvamine dimer) and the upper 868.2 Da node (**b**, annotated as a discorhabdin-discorhabdin-makaluvamine trimer) from group F (Fig.8).



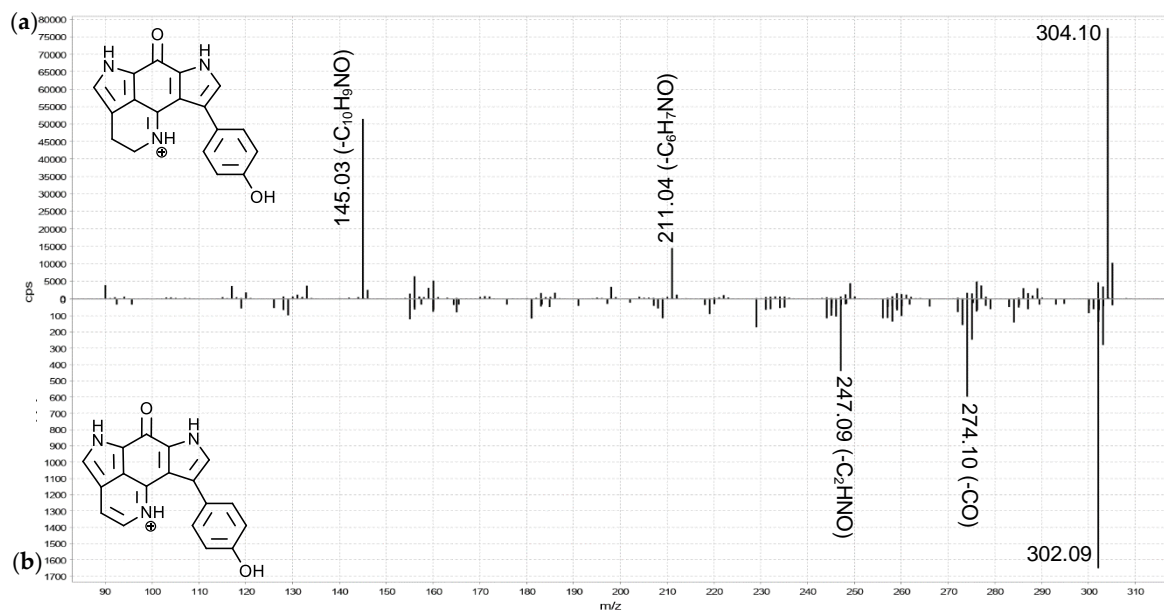

**S3.12:** MS<sup>2</sup> spectra of the 304.1 Da node (**a**, annotated as tsitsikammamine A) and the 302.1 Da node (**b**, annotated as 16,17-dehydrotsitsikammamine A) from group G.

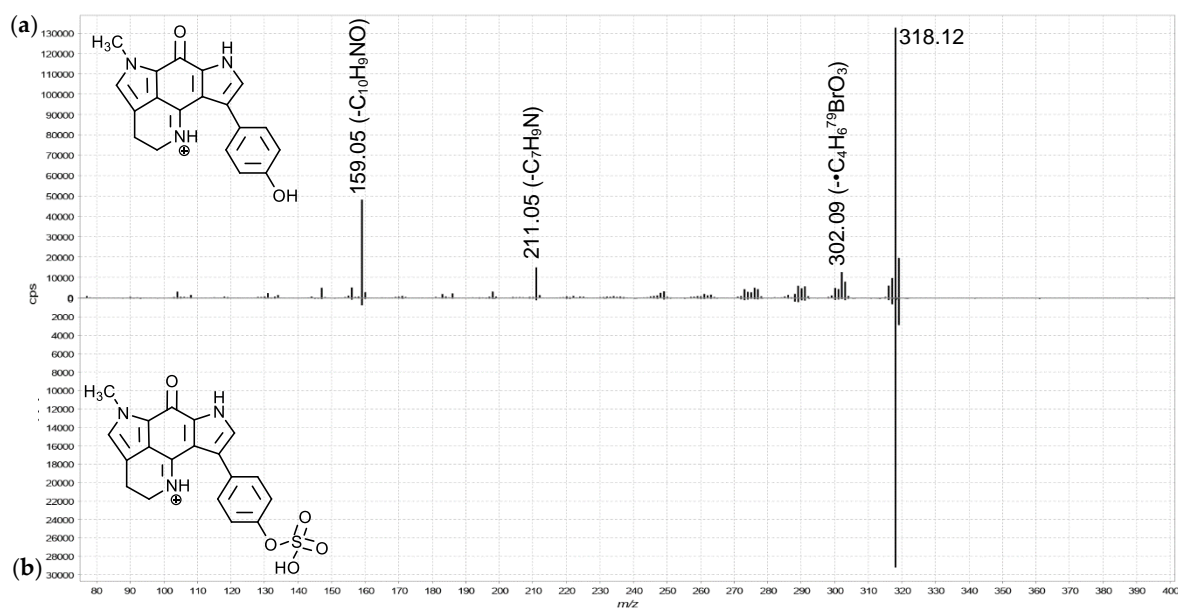

**S3.13:** MS<sup>2</sup> spectra of the 318.1 Da node (**a**, annotated as tsitsikammamine B) and the 398.1 node (**b**, putative sulfoxide derivative of tsitsikammamine B) from group G.

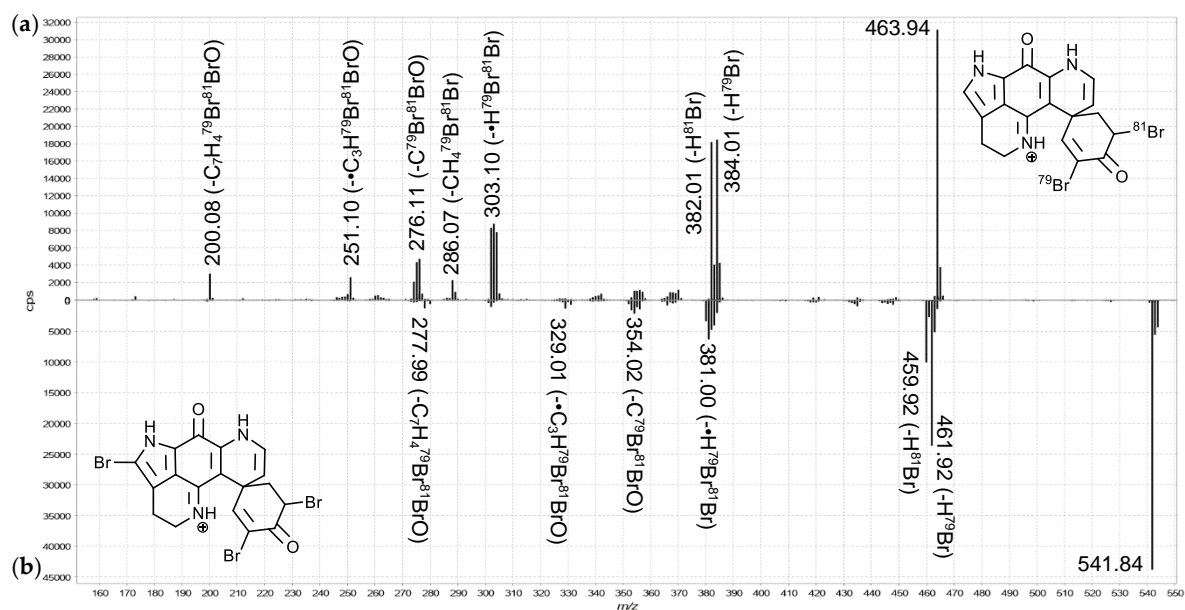

**S3.14:** MS<sup>2</sup> spectra of the leftmost 461.9 Da node (a, <sup>79</sup>Br<sup>81</sup>Br precursor, annotated as a discorhabdin C regimer) and the larger 539.8 Da node (b, <sup>79</sup>Br<sup>81</sup>Br precursor, annotated as a 14-bromodiscorhabdin C regimer) from group H.

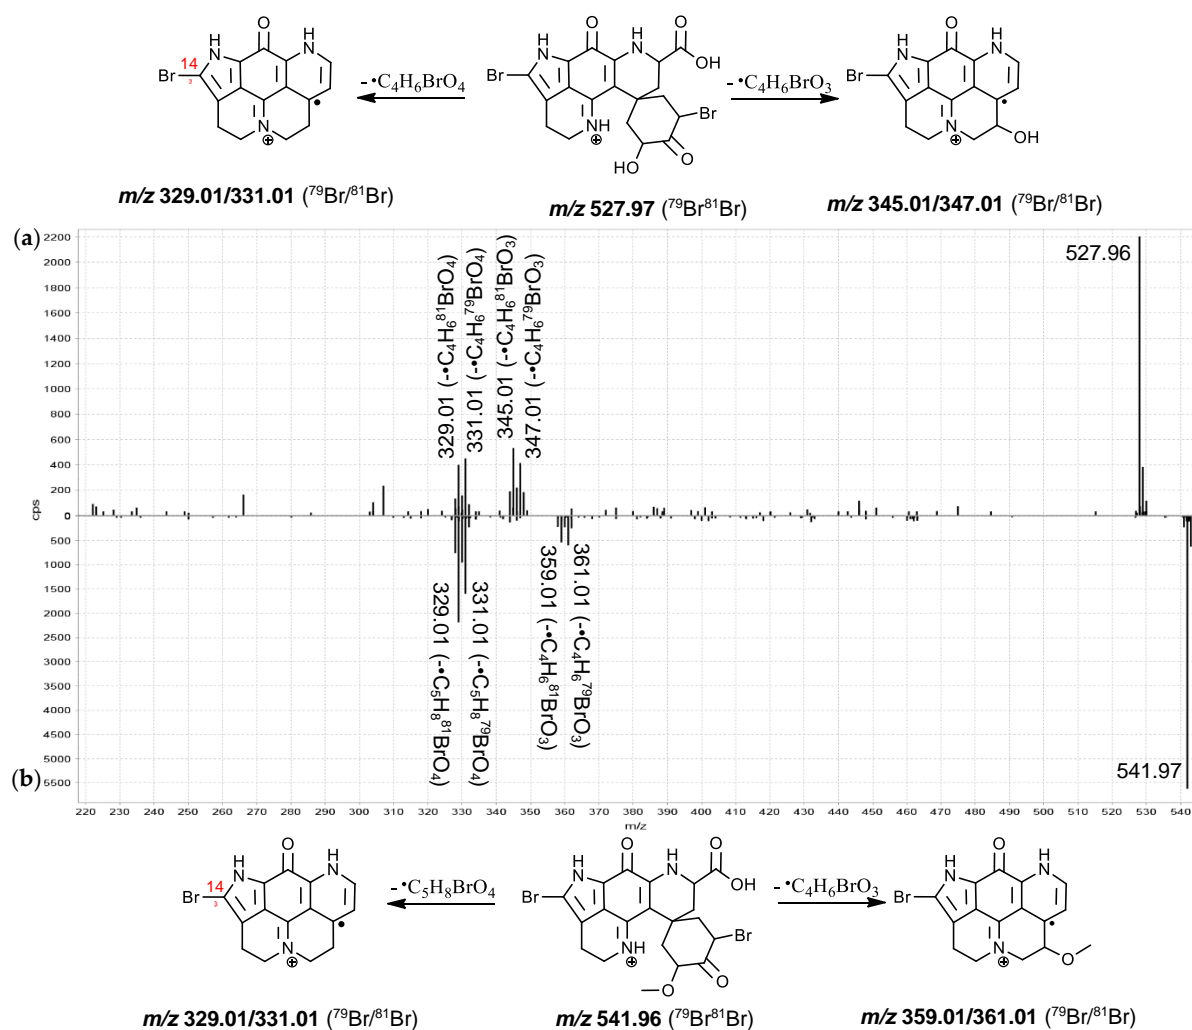

**S3.15:** MS<sup>2</sup> spectra (<sup>79</sup>Br<sup>81</sup>Br isotopes) of the nodes at 525.9 (a) and 540.0 Da (b) from group I, putatively annotated as new discorhabdins and proposed fragment structures.

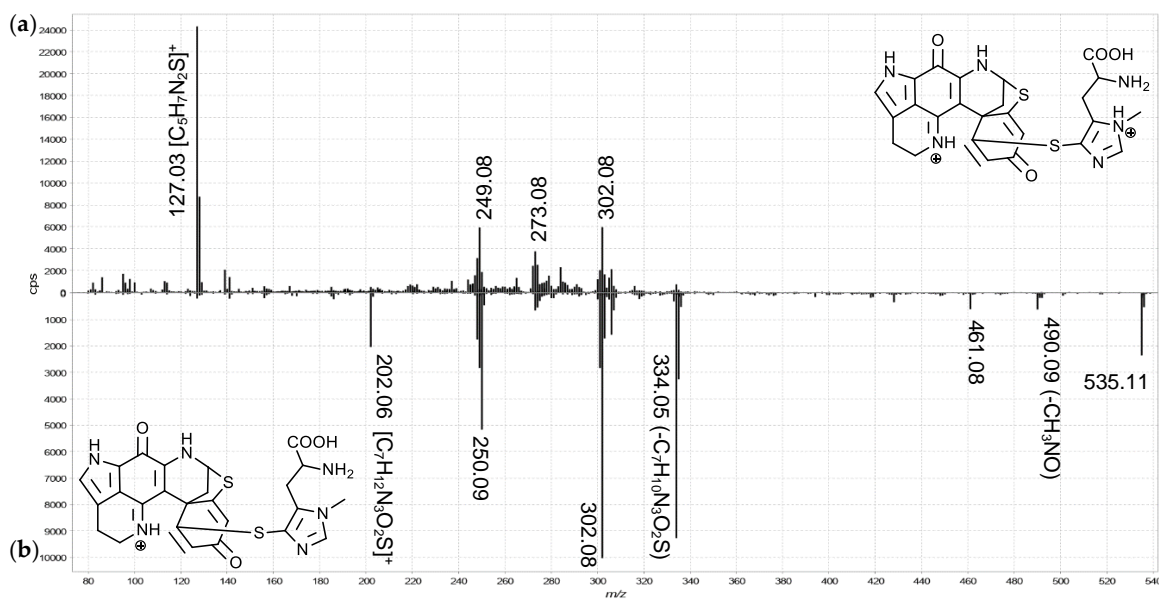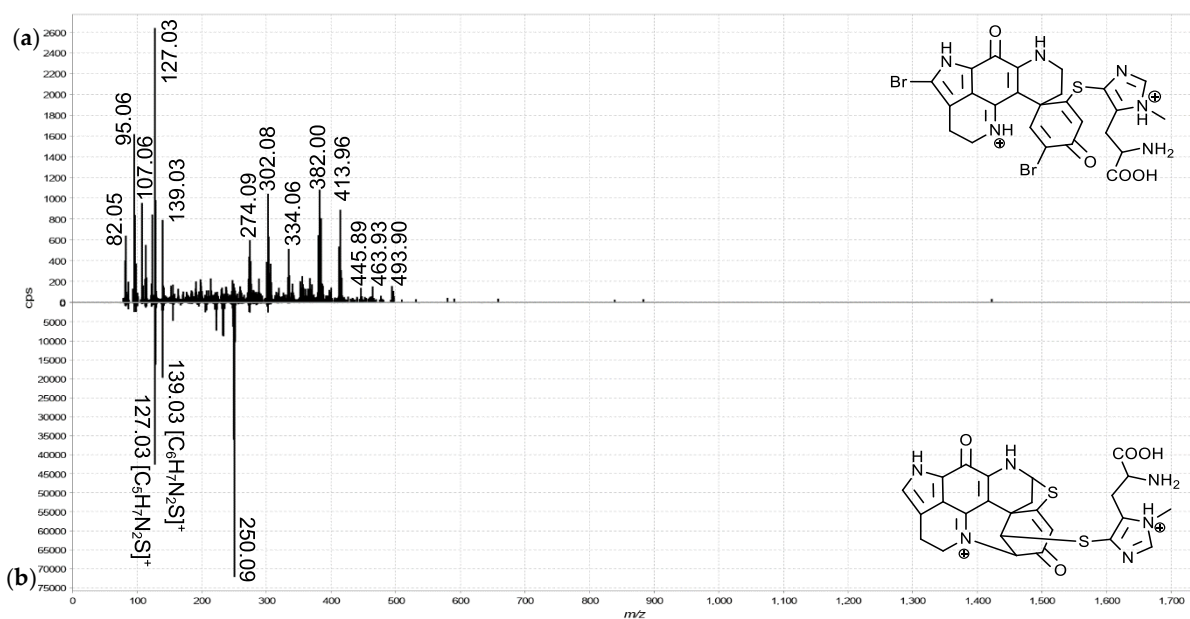



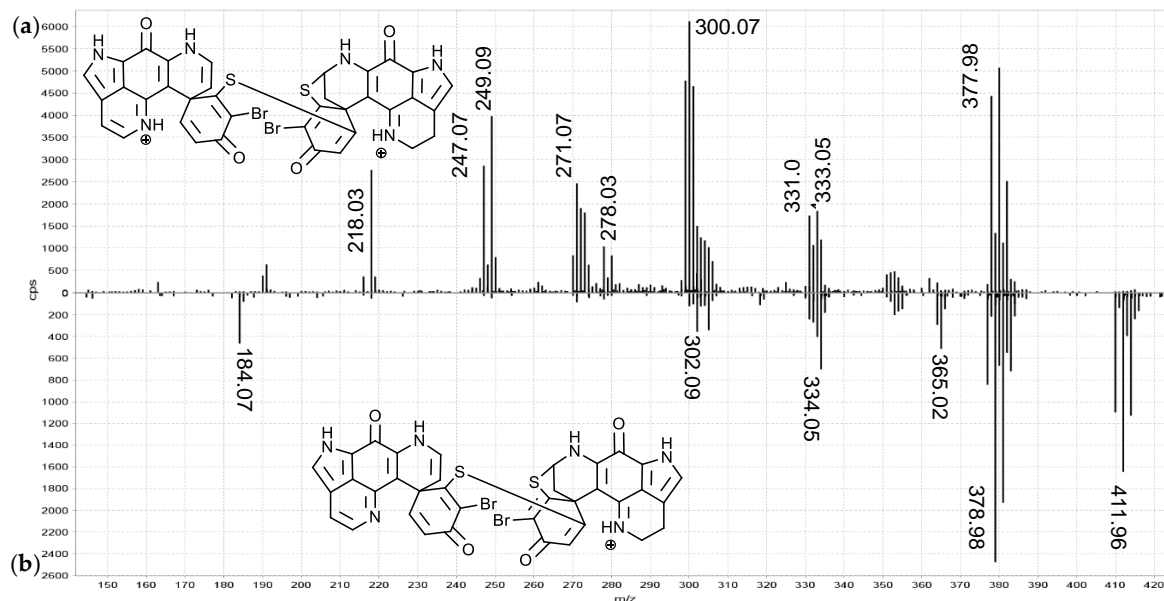

**S3.18:** MS<sup>2</sup> spectra of the doubly-charged 822.9 Da node (a) and the singly-charged 822.9 Da node (b) from group N, annotated as different charge-states of the same compound, a discorhabdin Q-dimer.

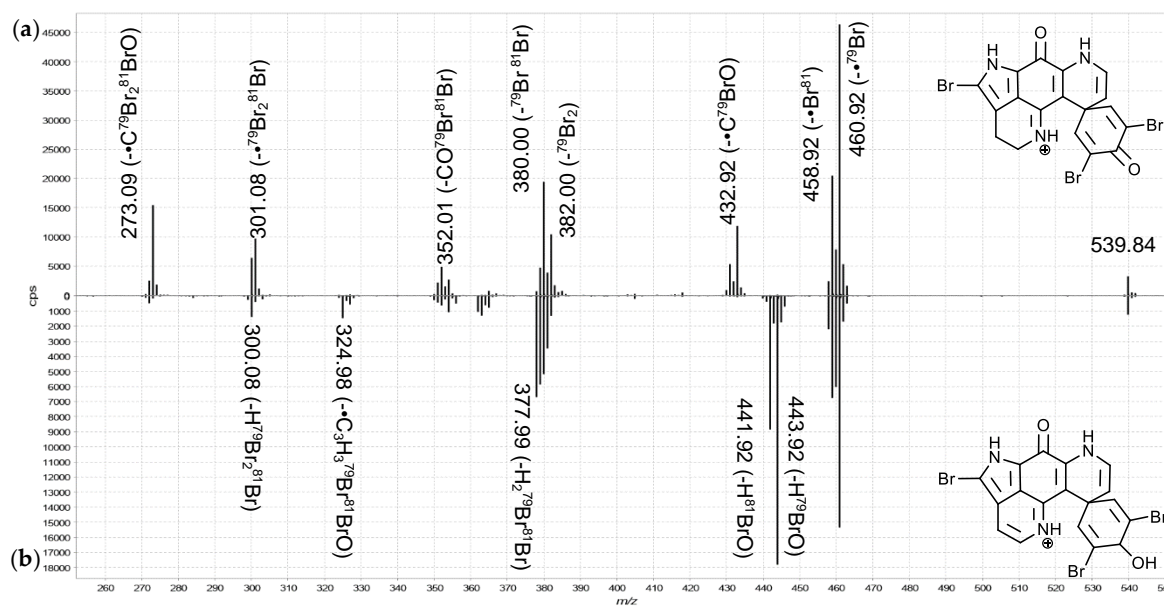

**S3.19:** MS<sup>2</sup> spectra of the large 537.8 Da singleton (a)  $^{79}\text{Br}_2^{81}\text{Br}$  precursor, annotated as 14-bromo-7,8-dehydrodiscorhabdin C) and the 537.8 Da node of the neighbouring cluster (b,  $^{79}\text{Br}_2^{81}\text{Br}$  precursor) from group O.

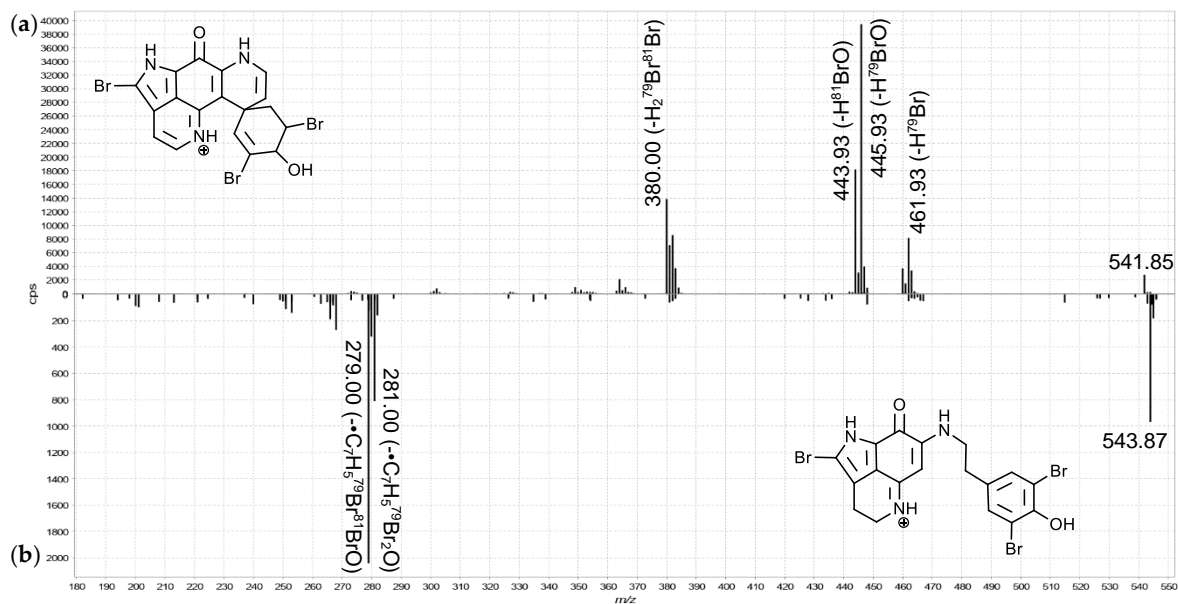

**S3.20:** MS<sup>2</sup> spectra of the 539.8 Da node (a) from the second cluster in group O annotated as a 14-bromo-3-dihydrodiscorhabdin C regioisomer and the 541.8 Da node (b) of the third cluster annotated as a new tribrominated analogues of makaluvamine D.

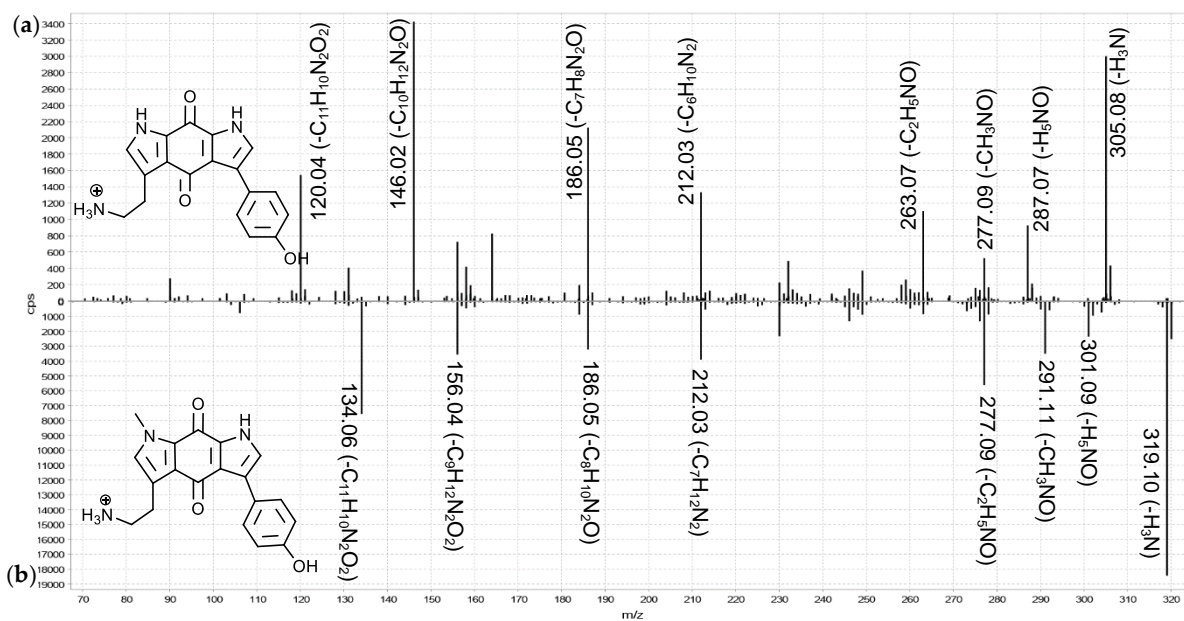

**S3.21:** MS<sup>2</sup> spectra of the 322.1 (a) and 336.1 Da (b) nodes in group O, possibly representing zyzzyanones.

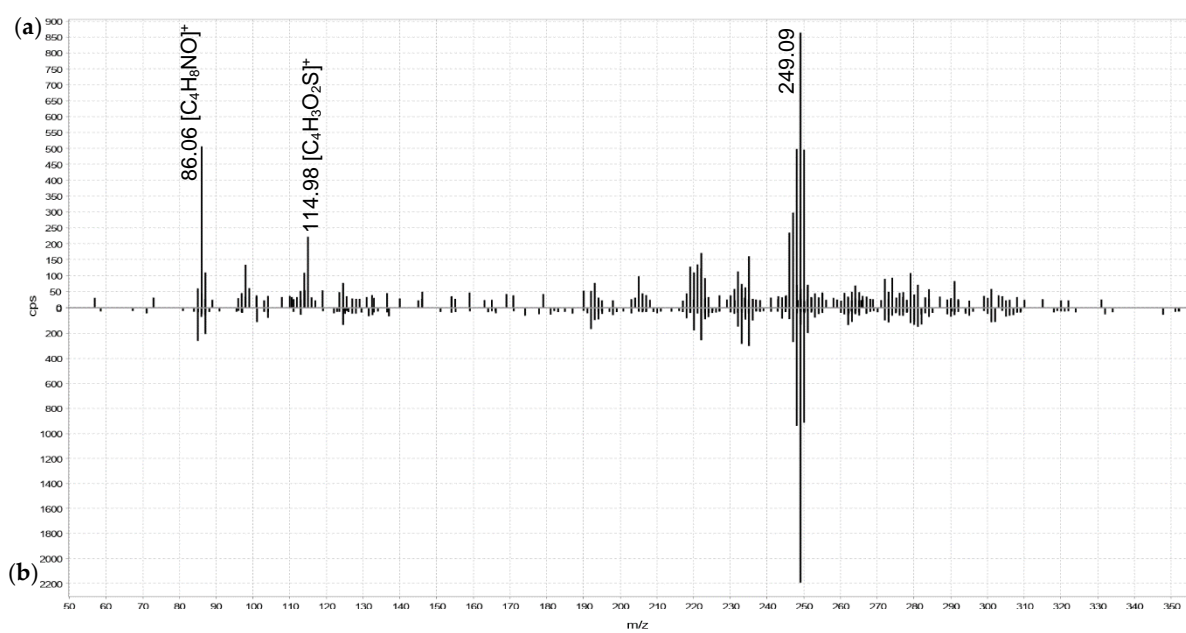

**S3.22:** MS<sup>2</sup> spectra of the 479.1 Da (**a**) and 507.2 Da (**b**) nodes from group O.
