# Supplementary material for: Unlocking the Diversity of Pyrroloiminoquinones Produced by Latrunculid Sponge Species
Source: MDPI journal article supplement (doi:10.3390/md19020068), 2021-01-28
Supplement: s1 [file s1]

S2: Molecular networks of data subsets (S2.1-S2.4) and non-pyrroloiminoquinone clusters and singleton nodes belonging to the molecular network shown in Fig. 2 (S2.5).

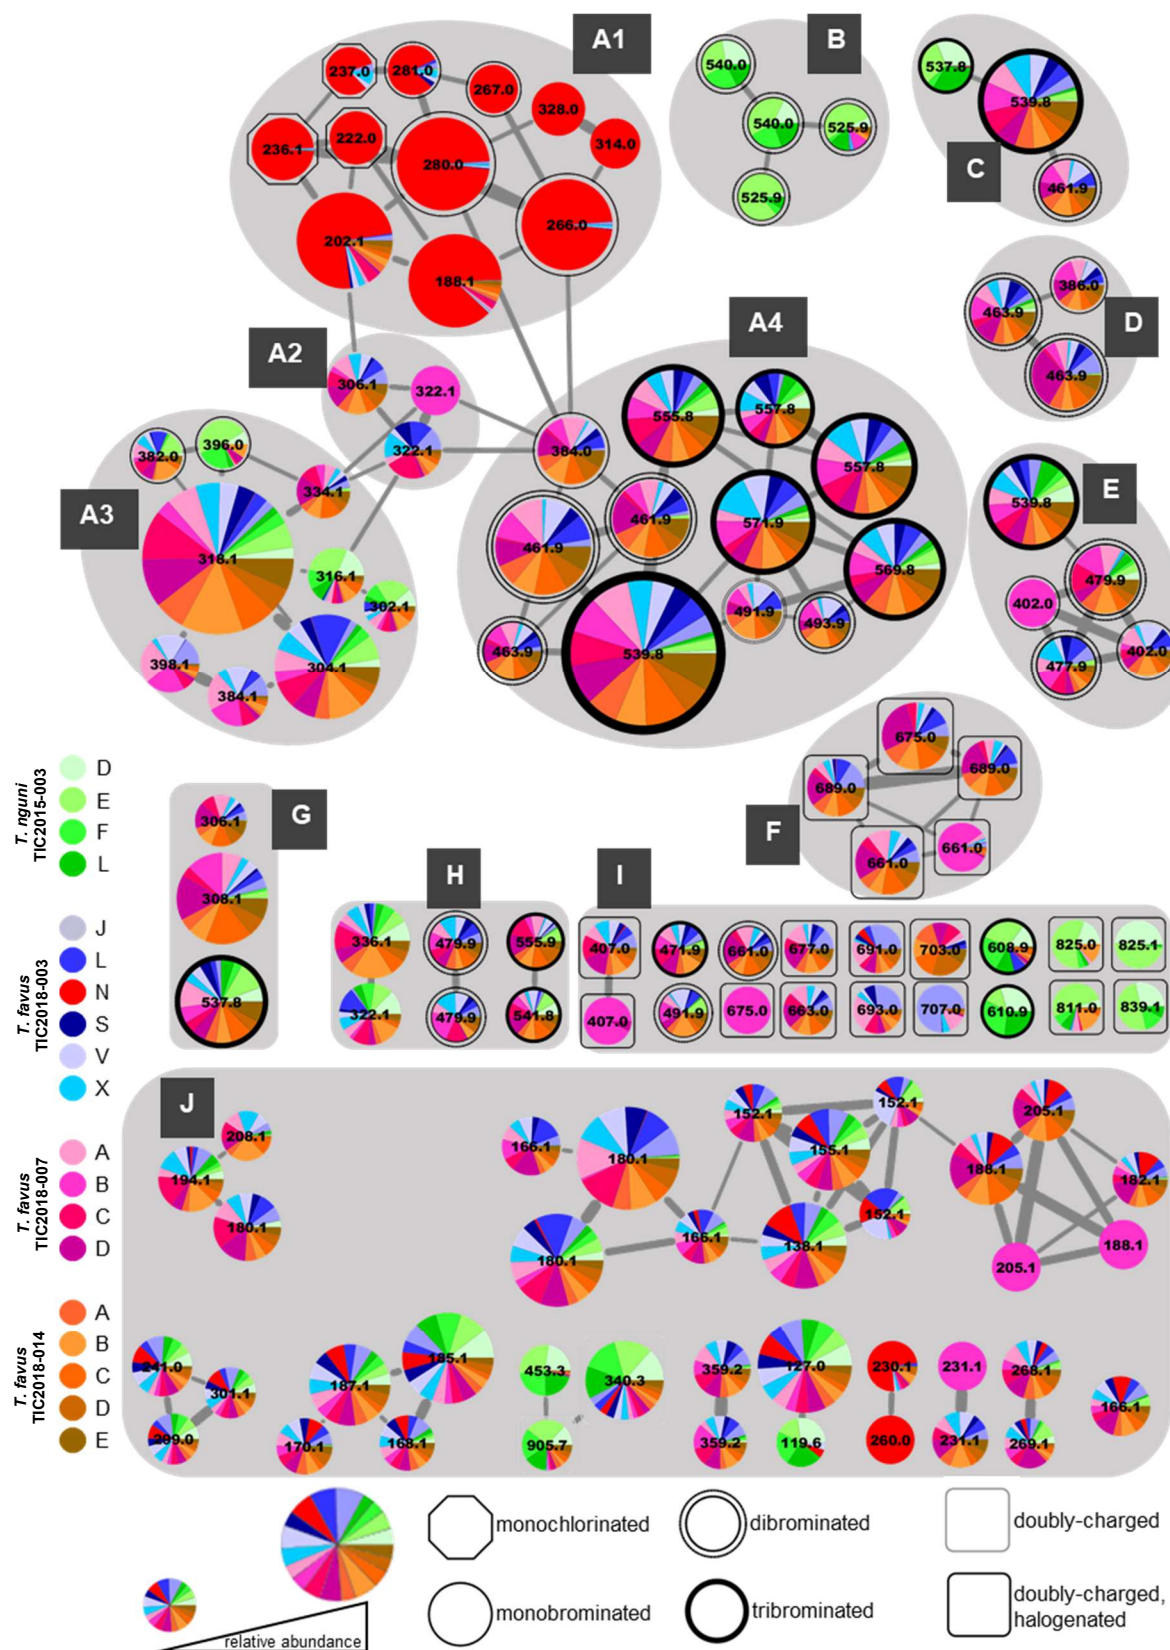

S2.1: Molecular Network of *T. nguni* and *T. favus* (min. cosine = 0.7). A1: Unbranched makaluvamines and damirones; A2: Discorhabdin I and a hydroxylated derivative; A3: Tsitsikammamines; A4:

Brominated C-series discorhabdins; **B**: Oxygenated discorhabdin derivatives; **C**: 3-Dihydro-7,8-dehydrodiscorhabdins; **D**: 3-Dihydrodiscorhabdins; **E**: V-series discorhabdins; **F**: Ovoidiol-substituted C-series discorhabdins; **G**: Branched makaluvamines and 14-bromo-16,17-dehydrodiscorhabdin C; **H**: Miscellaneous clusters of pyrroloiminoquinones and related compounds; **I**: Miscellaneous brominated singletons; **J**: Non-pyrroloiminoquinones.  
<https://gnps.ucsd.edu/ProteoSAFe/status.jsp?task=3479207be99841bd8ed4092c5cbb0bab>

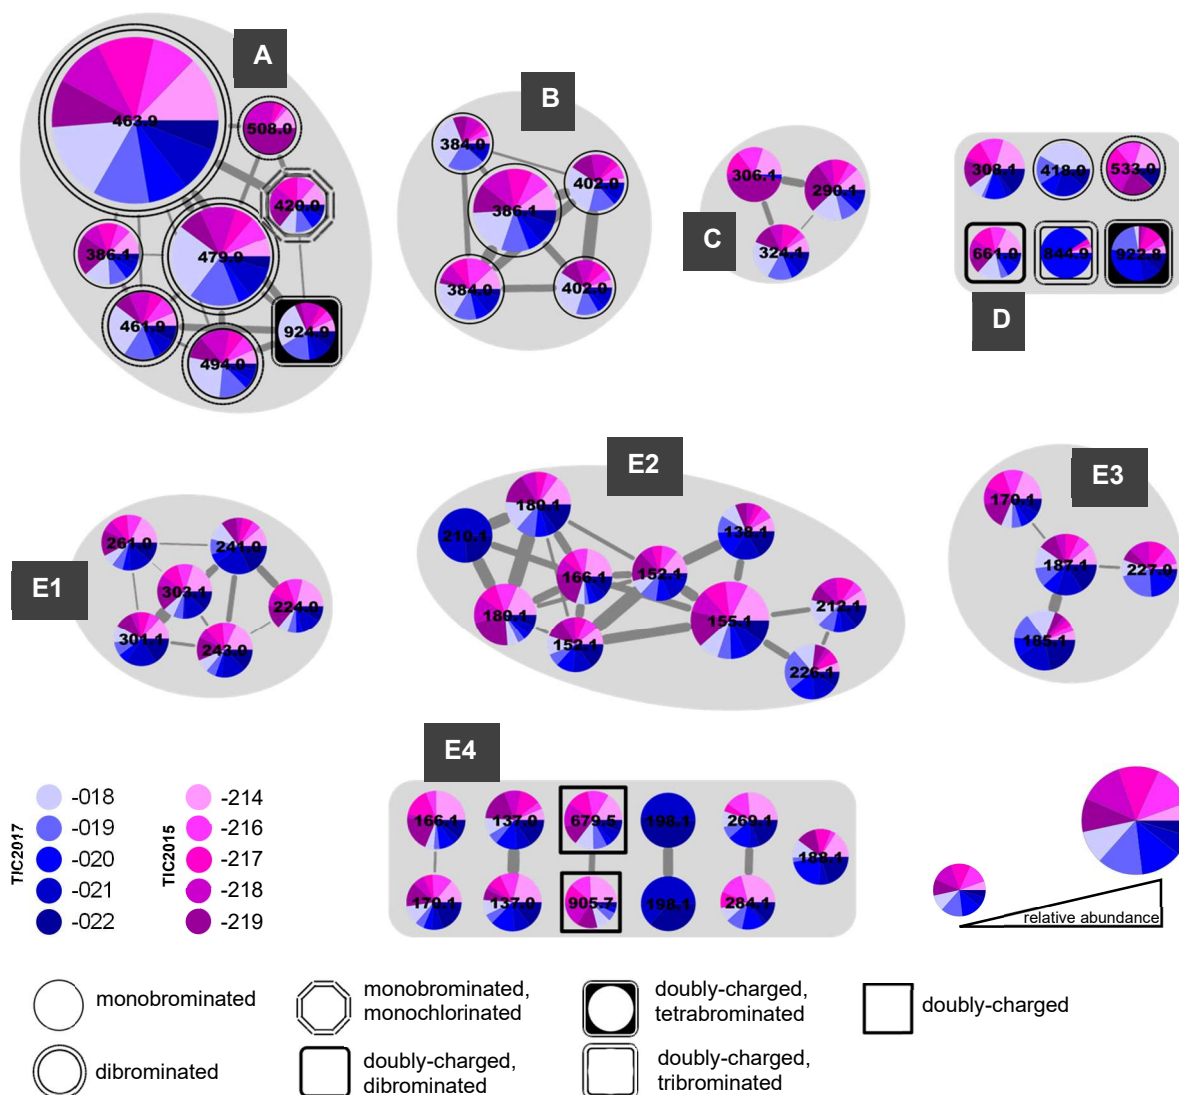

**S2.2: Molecular Network of *T. pedunculata* (min. cosine = 0.6).** **A:** 3-Dihydrodiscorhabdins of the C-series; **B:** C-3 carbonyldiscorhabdins of the C- and V-series; **C:** Discorhabdin I and Derivatives; **D:** Miscellaneous pyrroloiminoquinone singletons; **E1-E4:** Non-pyrroloiminoquinone Compounds.  
<https://gnps.ucsd.edu/ProteoSAFe/status.jsp?task=30bb99d64d594558a324bb342cf1008d>

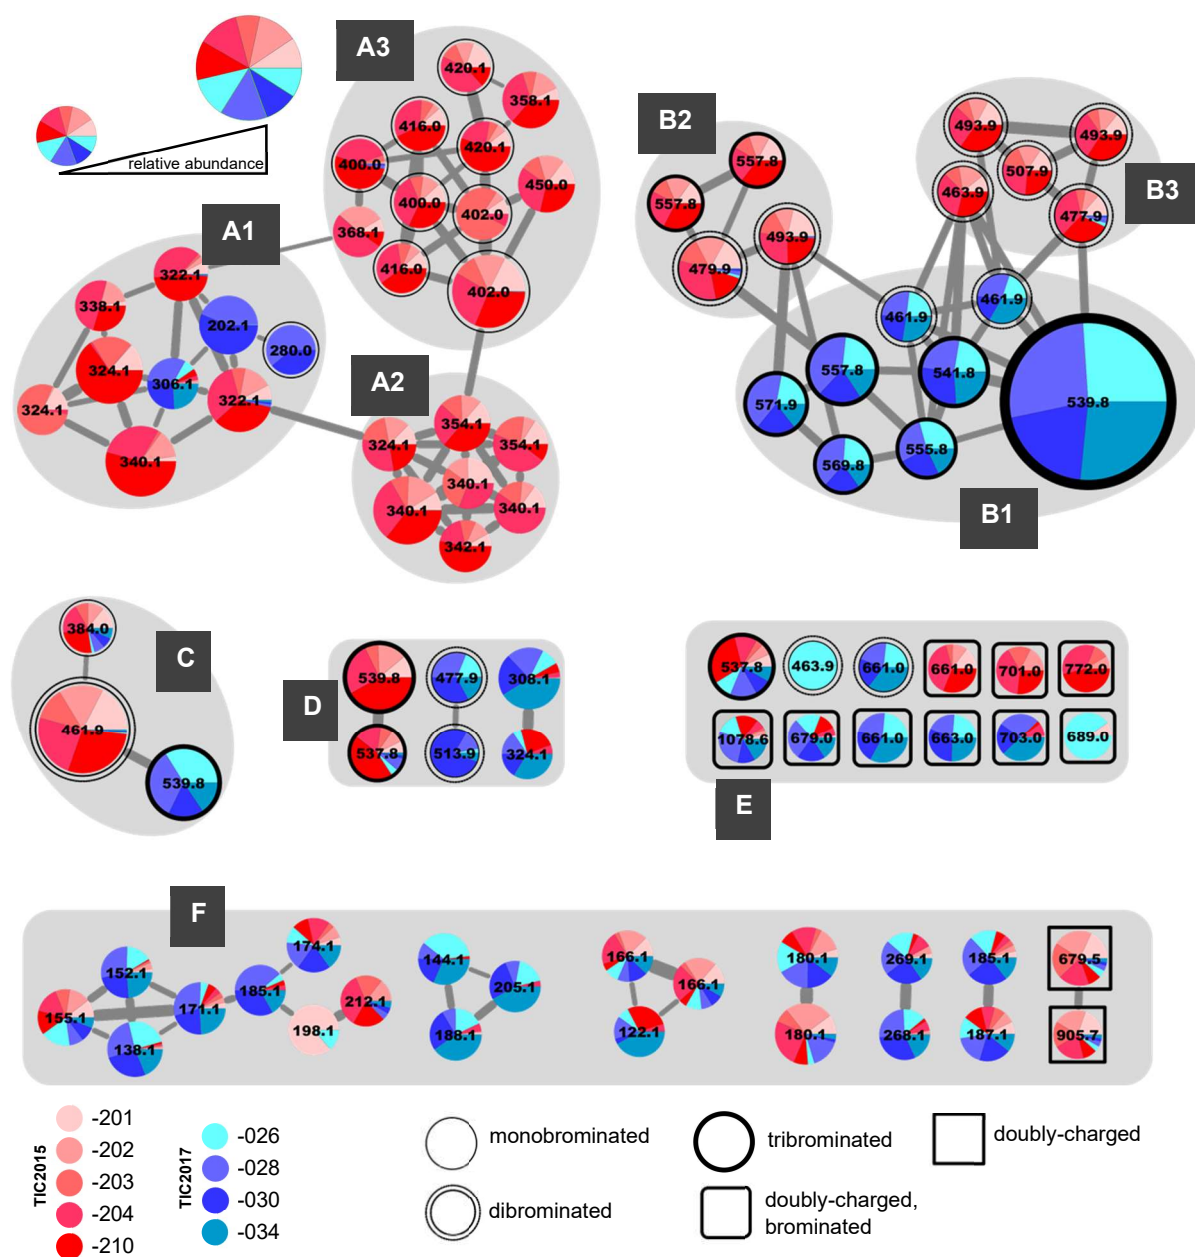

**S2.3:** Molecular Network of extracts from *T. michaeli* (min. cosine = 0.7). **A1:** Makaluvamines and discorhabdins; **A2:** New hydroxylated discorhabdins; **A3:** New C-series discorhabdins; **B1-B3:** Multibrominated C-series discorhabdins; **C:** 3-Dihydro-7,8-dehydrodiscorhabdins; **D:** Miscellaneous pyrroloiminoquinone clusters; **E:** Miscellaneous pyrroloiminoquinone singletons; **F:** Non-pyrroloiminoquinones.

(<https://gnps.ucsd.edu/ProteoSAFe/status.jsp?task=5bd2a003af0a48f98a8e001ea837b222>)



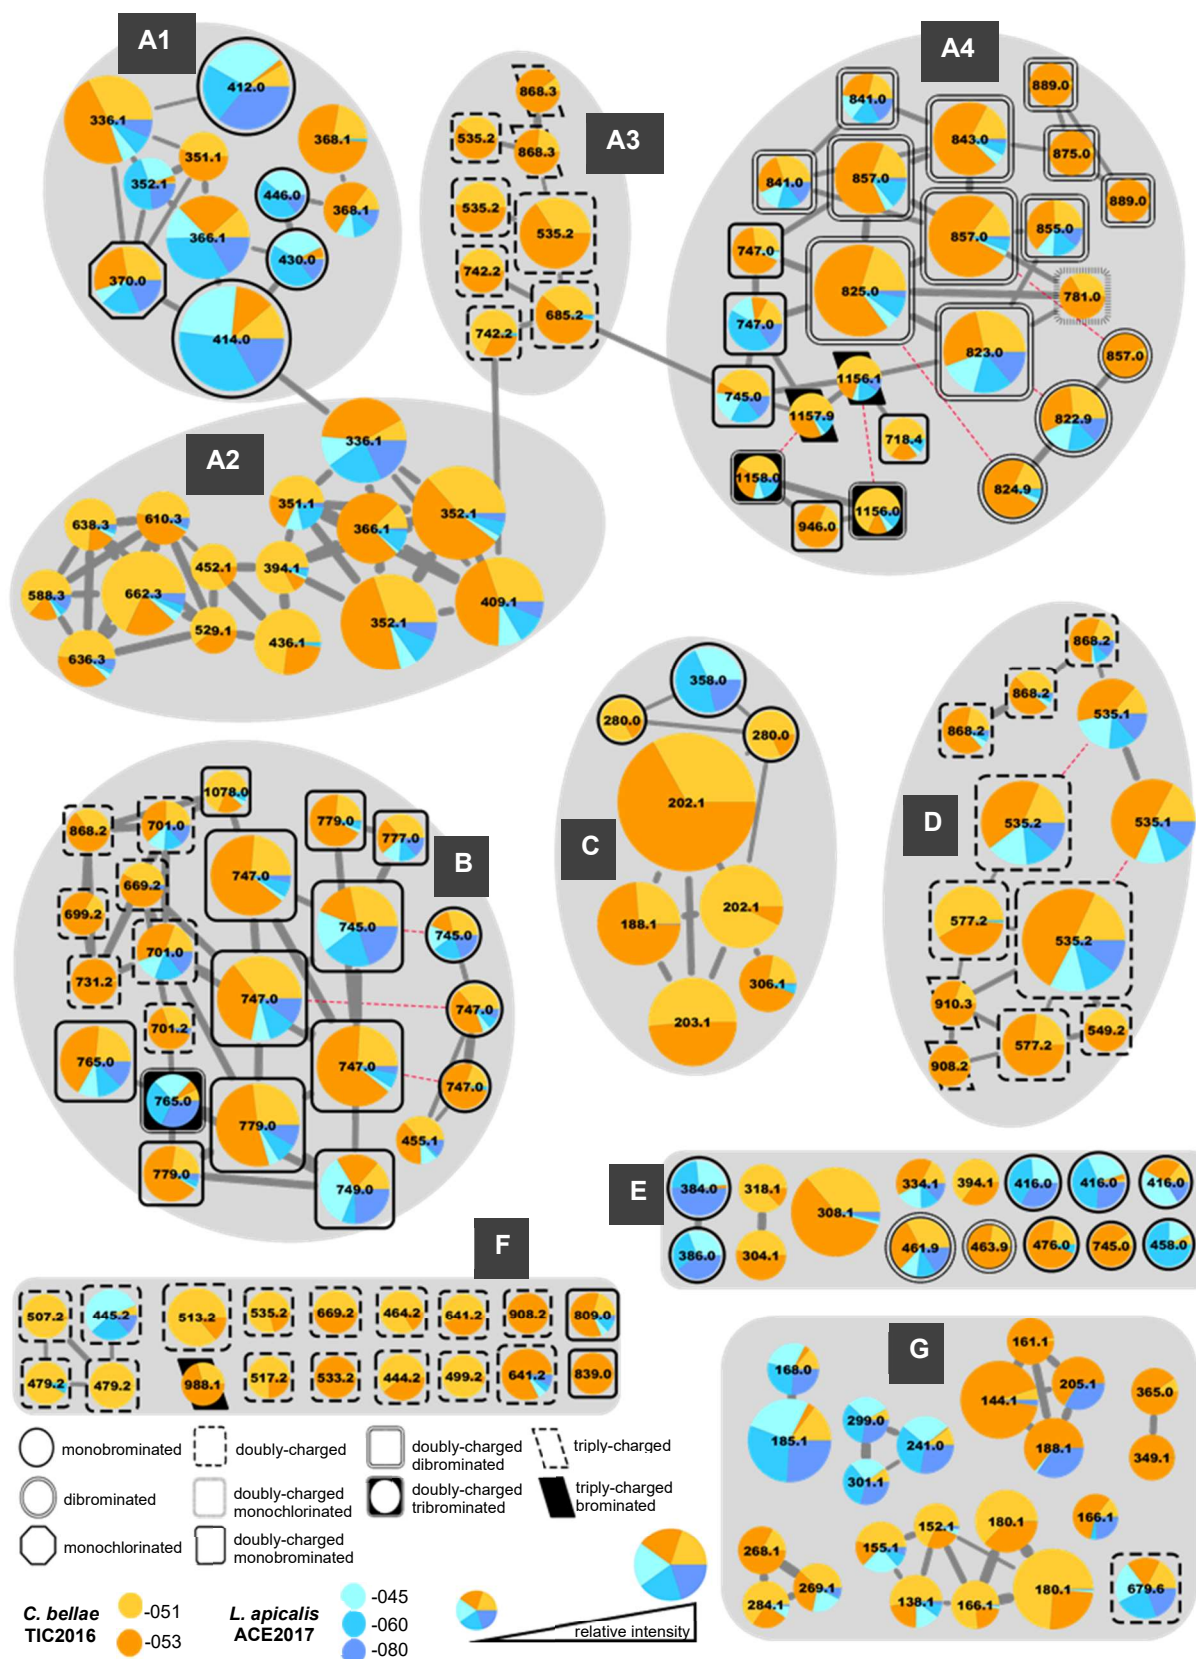

**S2.4:** Molecular Network of *C. bellae* and *L. apicalis* (min. cosine = 0.7). **A1:** Discorhabdins of the A- and D-series; **A2:** Discorhabdins of the D- and A-series; **A3:** Non-brominated pyrroloiminoquinone di- and trimers; **A4:** Thioether-bridged discorhabdin dimers; **B:** Disulphide-bridged discorhabdin di- and

trimers; **C**: Unbranched makaluvamines and related compounds; **D**: Ovothiol-substituted A/D-series discorhabdins; **E**: Other pyrroloiminoquinones; **F**: Multiply-charged clusters and singletons; **G**: Non-pyrroloiminoquinones.

(<https://gnps.ucsd.edu/ProteoSAFe/status.jsp?task=6ba31b7a4a114164ac71a7ecc1076435>)

Note: The molecular networks shown in S2.1.-S2.4. were created from the same raw data and in the same manner as the molecular network in the main article (Fig. 2.) except for S2.2 for which a less stringent minimum cosine value (0.6) was selected due to the limited number of features.

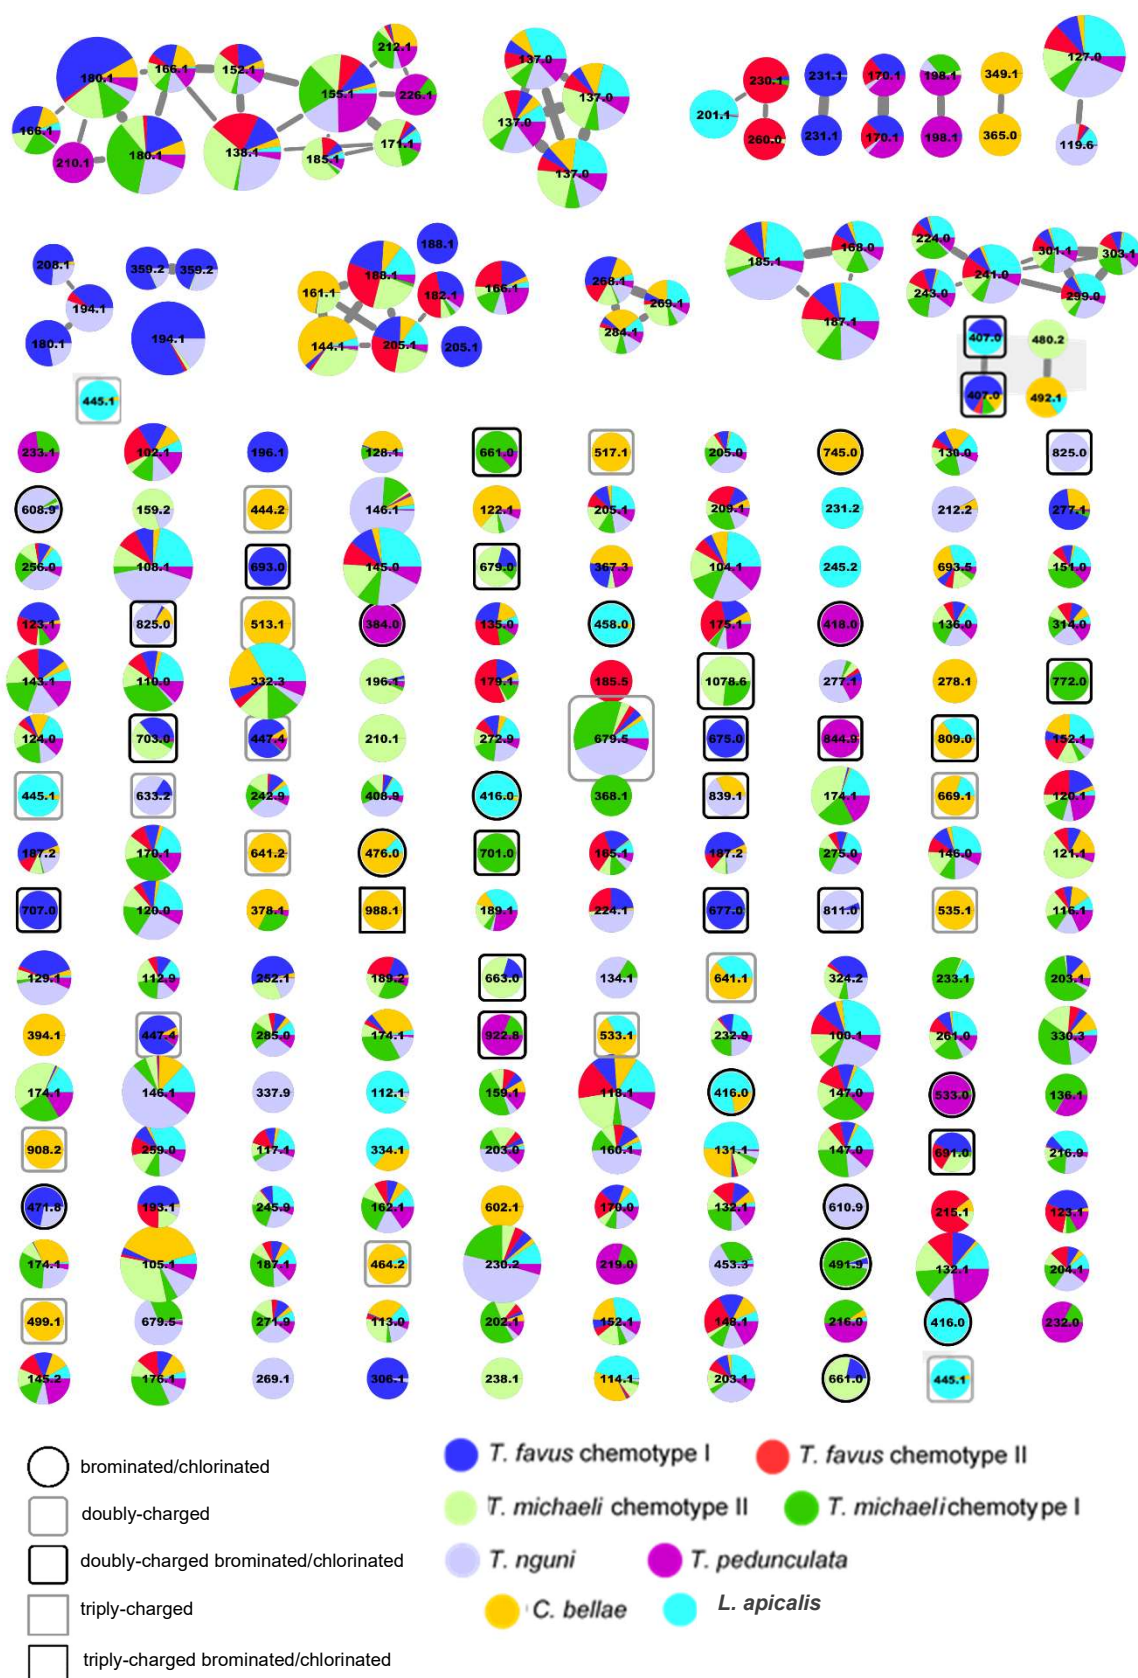

S2.5: Non-pyrroloiminoquinone clusters and singleton nodes belonging to the molecular network shown in Fig. 2.
