# Supplementary material for: Unlocking the Diversity of Pyrroloiminoquinones Produced by Latrunculid Sponge Species
Source: MDPI journal article supplement (doi:10.3390/md19020068), 2021-01-28
Supplement: s1 [file s1]

## Supplementary Materials

### S1. Isolation of makaluvamine C from *C. bellae*

Frozen sponge material of a *C. bellae* specimen (TIC2016-053) was extracted with MeOH–DCM (1:2, v/v) and concentrated *i. vac.*. The sample was backloaded onto HP20, washed with water, eluted with MeOH and dried *i. vac.*. Extract material was resuspended in MeOH and fractionated into 12 fractions on Sephadex LH-20 (H<sub>2</sub>O–MeOH–FA, 70:30:0.05, v/v/v). Fractions 3 to 6 were united, dried *i. vac.* and dissolved in MeOH, followed by RP-SPE (10 g C-18, H<sub>2</sub>O–MeOH–FA, 80:20:0.05, v/v/v) to yield six fractions, with the first fraction containing makaluvamine C. The <sup>1</sup>H-NMR spectrum (A1.1) was consistent with literature reports [14] and the HMBC (A1.2) confirmed the position of the methyl group. Mass spectrometric analysis was performed in the same manner as described in section 4. *Materials and Methods*, indicated a molecular ion formula of [C<sub>11</sub>H<sub>12</sub>N<sub>3</sub>O]<sup>+</sup> ( $m/z_{\text{exp}}$ =202.0930,  $m/z_{\text{calc}}$ =202.0980) and revealed a characteristic dominant methane neutral loss (A1.3). NMR spectra were obtained on a Bruker Avance DRX-600 MHz spectrometer (Bruker, Rheinstetten, Germany).

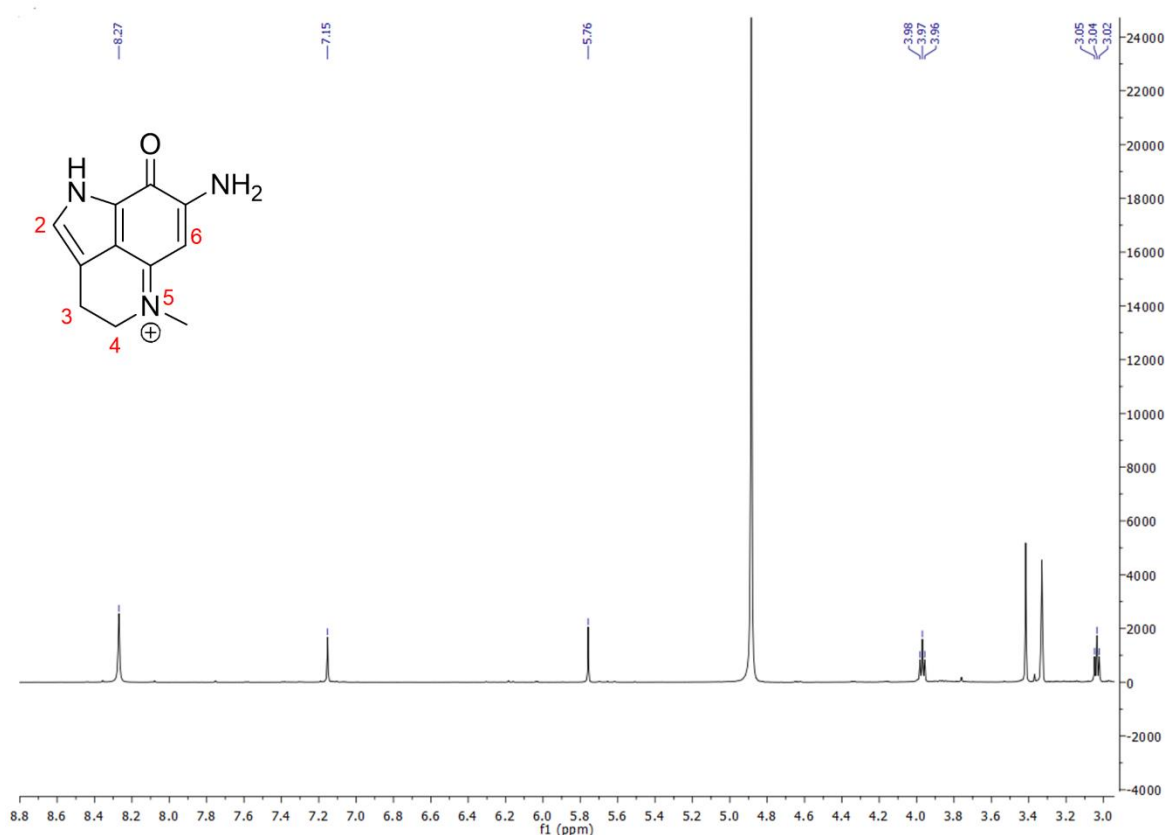

**S1.1:** <sup>1</sup>H-NMR spectrum of the makaluvamine C isolate in CD<sub>3</sub>OD.

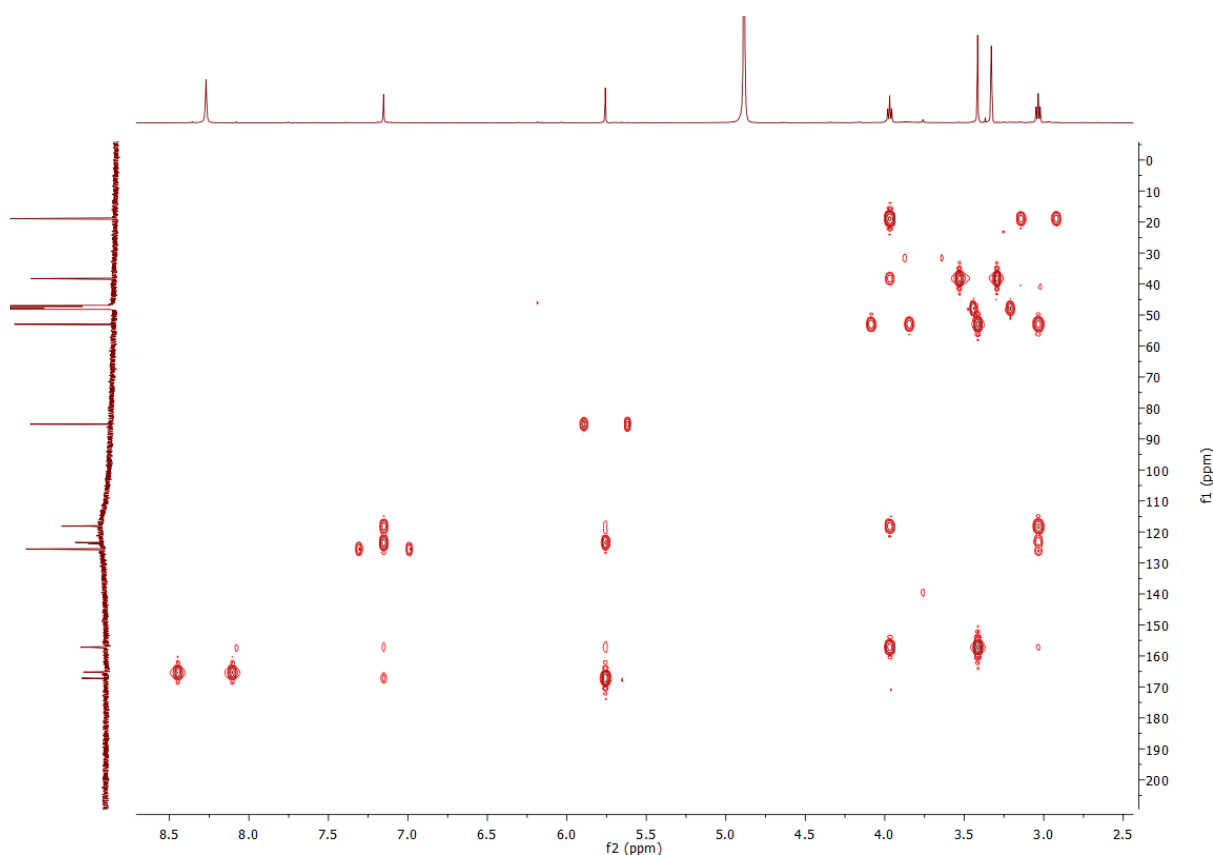

**S1.2:** HMBC spectrum of the makaluvamine C isolate in CD<sub>3</sub>OD.

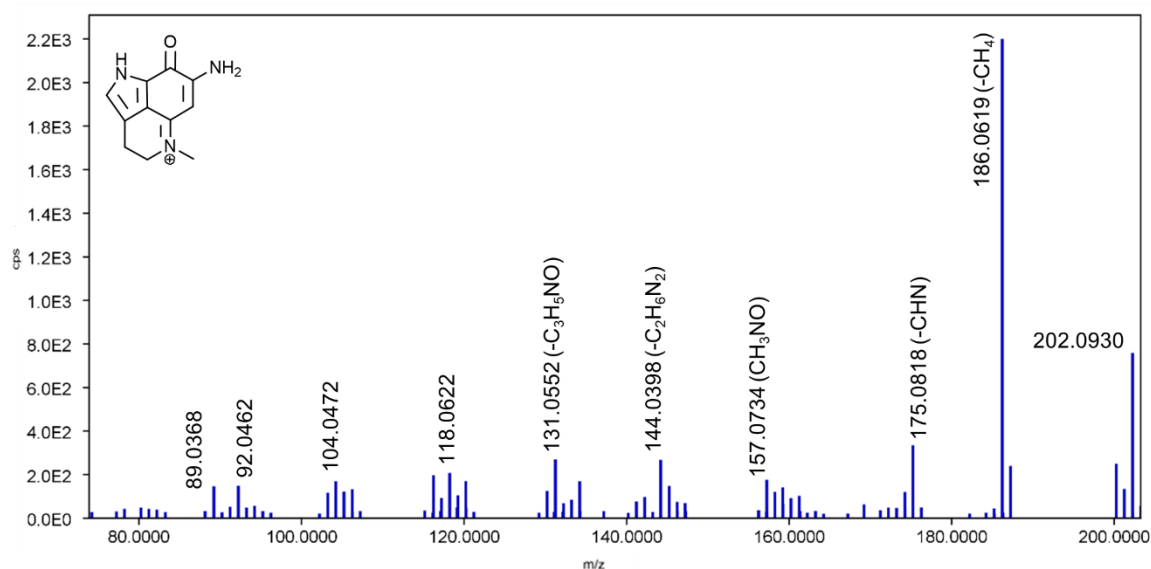

**S1.3:** MS<sup>2</sup> spectrum (collision energy = 40 eV; LC-MS/MS mode) of the makaluvamine C isolate.

### Isolation of 3-dihydrodiscorhabdin C from *T. pedunculata*

Frozen sponge material of a *T. pedunculata* specimen (TIC2015-216) was extracted with MeOH-DCM (1:2, v/v) and dried *i.vac.*. Extract material was resuspended in MeOH and separated through RP-SPE (10 g C-18, H<sub>2</sub>O-MeOH-FA, 60:40:0.05, v/v/v). One major fraction was selected as a dark red band and dried *i. vac.*. This fraction was dissolved in MeOH and again subjected to RP-SPE (2 g C-18, H<sub>2</sub>O-MeOH-FA, 70:30:0.05, v/v/v) to yield 3-dihydrodiscorhabdin C as a dark red solid. <sup>1</sup>H-NMR, COSY and

HMBC data (A2.1-A2.3) were consistent with published values [1] and were acquired using a Bruker Avance DRX-600 MHz spectrometer (Bruker, Rheinstetten, Germany).

Mass spectrometric analysis was carried out in direct injection mode of a MeOH solution using the same ESI-QToF parameters as described in section 4. *Materials and Methods*. The MS<sup>2</sup> spectrum (A2.4) confirmed the expected  $m/z$  value of the  $[M+H]^+$  ion corresponding to an ion formula of  $[C_{18}H_{16}Br_2N_3O_2]^+$  ( $m/z_{exp}=463.9600$ ,  $m/z_{calc}=463.9609$ ) and showed a prominent neutral loss of  $H_3BrO$  ( $m/z$  366) and all other significant neutral losses were found to incorporate bromine and oxygen. A putative fragmentation mechanism is shown in A2.4 beginning with proton migration, inductive cleavage of water and a ring expansion (RE). This is proposedly followed by elimination of hydrogen bromide and combined hydrogen migration and rearrangement driven by aromatization to produce a highly conjugated product ion at  $m/z$  366.0272. The second most (but much less) intense product ion at  $m/z$  287.1082 corresponds to neutral loss of an additional bromine radical, however, the preferred ion structure and whether it is in fact formed along the same pathway as the  $m/z$  366.0272 fragment are still unknown and the fragmentation mechanism of this compound is subject of ongoing investigation.

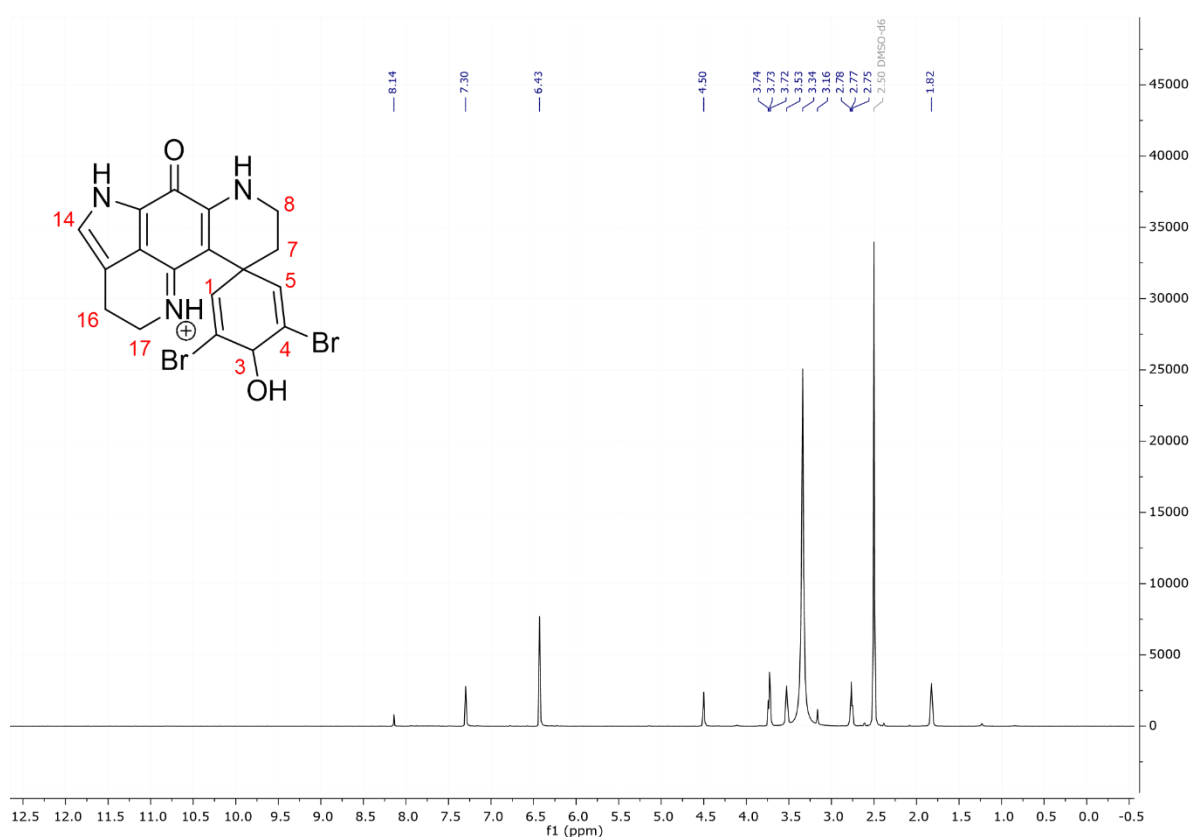

**S1.4:** <sup>1</sup>H-NMR spectrum of 3-dihydrodiscorhabdin C in DMSO-d<sub>6</sub>.

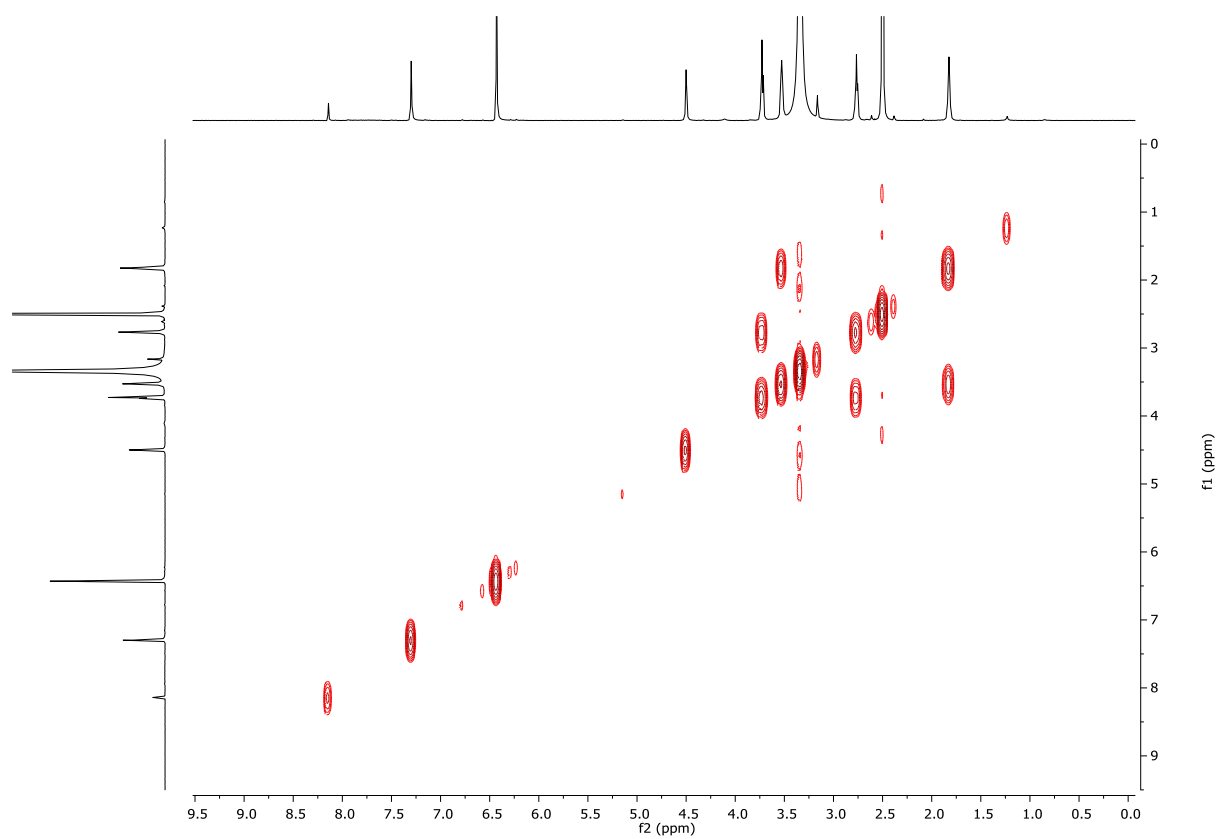

**S1.5:** COSY spectrum of 3-dihydrodiscorhabdin C in DMSO-d<sub>6</sub>.

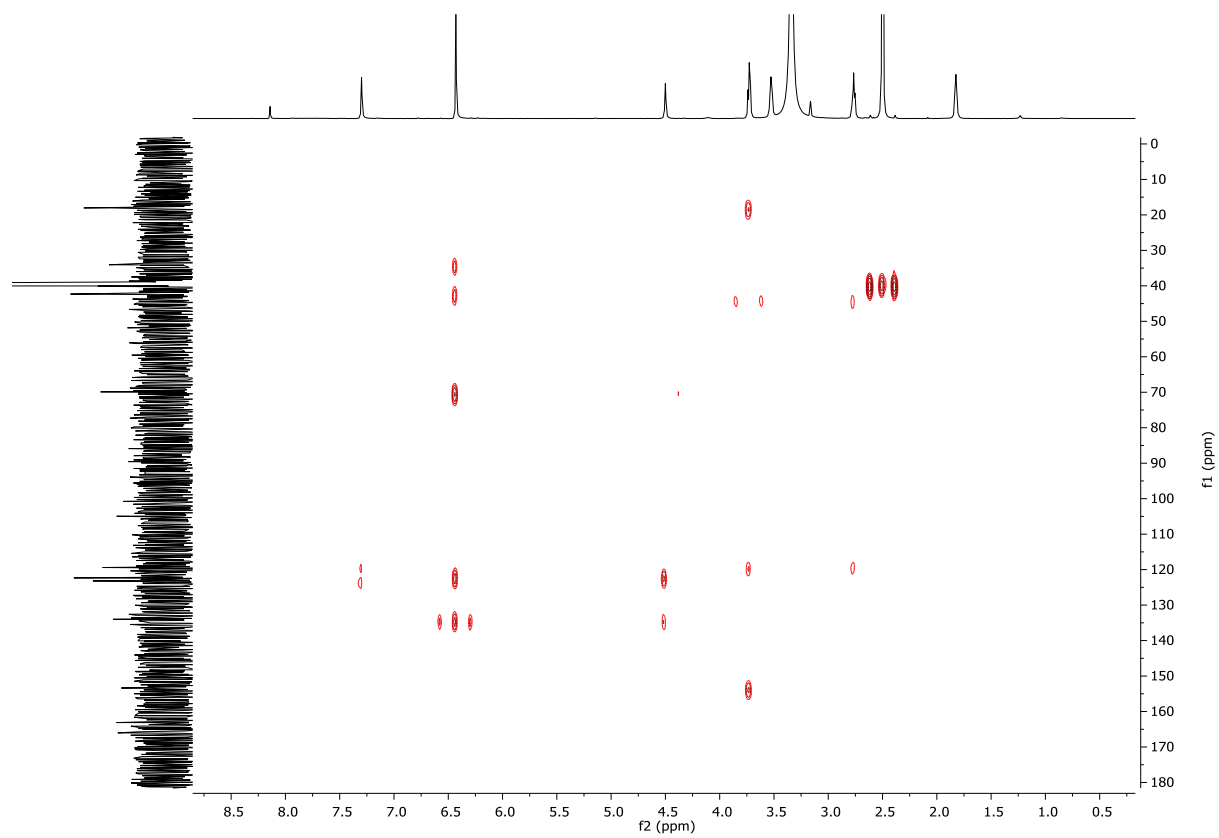

**S1.6:** HMBC spectrum of 3-dihydrodiscorhabdin C in DMSO-d<sub>6</sub>.

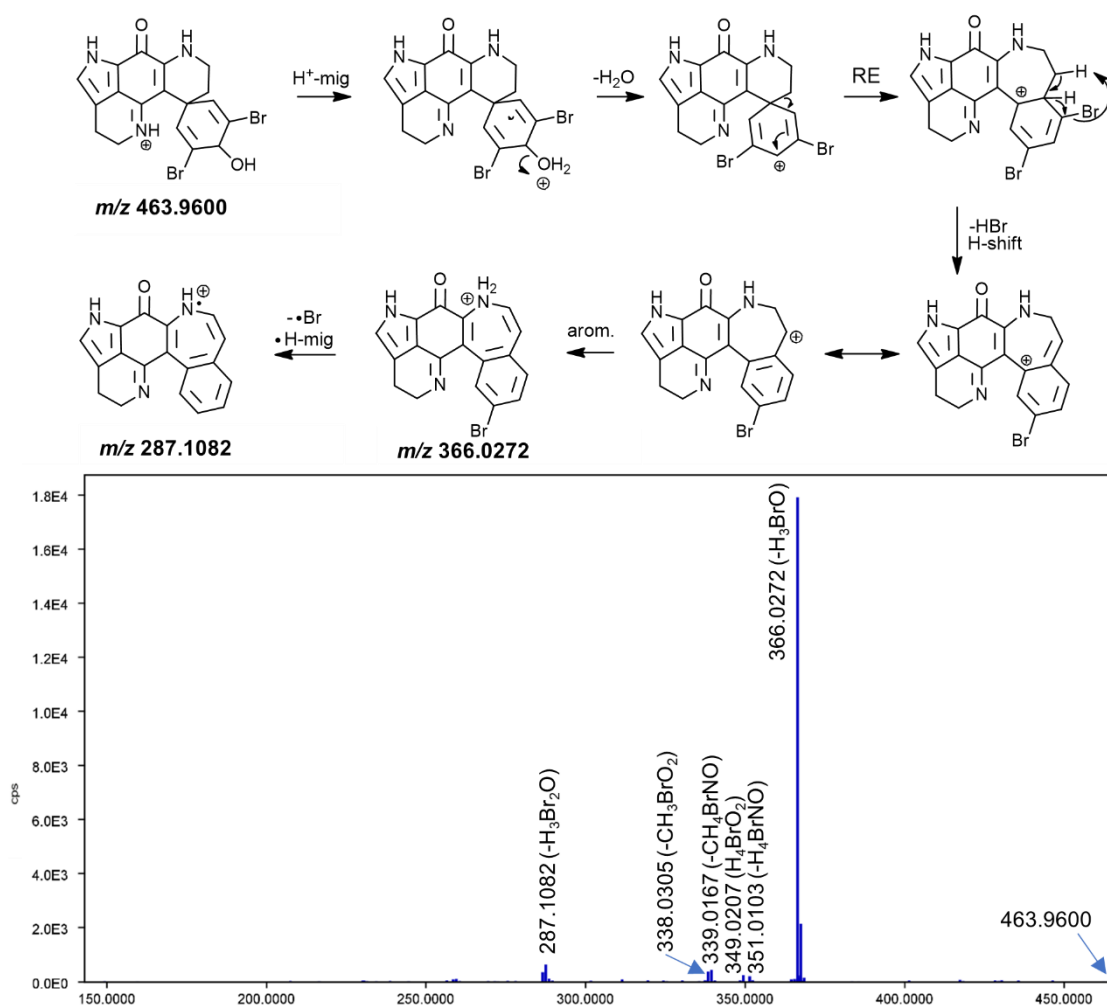

**S1.7:** MS<sup>2</sup> spectrum (collision energy = 40 eV; direct injection mode) of the monoisotopic precursor ion of 3-dihydrodiscorhabdin C (463.96 Da) and proposed fragmentation reactions.

## Reference

1. Copp, B.R.; Fulton, K.F.; Perry, N.B.; Blunt, J.W.; Munri, M.H.G. Natural and Synthetic Derivatives of Discorhabdin C, a Cytotoxic Pigment from the New Zealand Sponge *Latrunculia* cf. bocagei. *J. Org. Chem.* **1994**, *59*, 8233–8238, doi:10.1021/jo00105a047.
